# Supplementary material
Source: publisher figshare collection journal article supplement (https://acs.figshare.com/ndownloader/files/3885529)

## Supporting Information

### Heterobimetallic Dinuclear Lanthanide Alkoxide Complexes as Acid-base

#### Difunctional Catalysts for Transesterification

Ruijie Zeng,<sup>†</sup> Hongting Sheng,<sup>\*,†</sup> Yongcang Zhang,<sup>†</sup> Yan Feng,<sup>\*,†</sup> Zhi Chen,<sup>†</sup> Junfeng Wang,<sup>†</sup> Man Chen,<sup>†</sup> Manzhou Zhu,<sup>†</sup> and Qingxiang Guo<sup>‡</sup>

<sup>†</sup>School of Chemistry and Chemical Engineering & Key Laboratory of Environment-friendly Polymer Materials of Anhui Province, Anhui University, Hefei 230039, China

<sup>‡</sup>Department of Chemistry, University of Science and Technology of China, Hefei, 230026, China

E-mail: sht\_anda@126.com.

E-mail: fy70@163.com.

#### Contents

|                                                          |        |
|----------------------------------------------------------|--------|
| Copies of <sup>1</sup> H and <sup>13</sup> C NMR Spectra | S2-S26 |
|----------------------------------------------------------|--------|

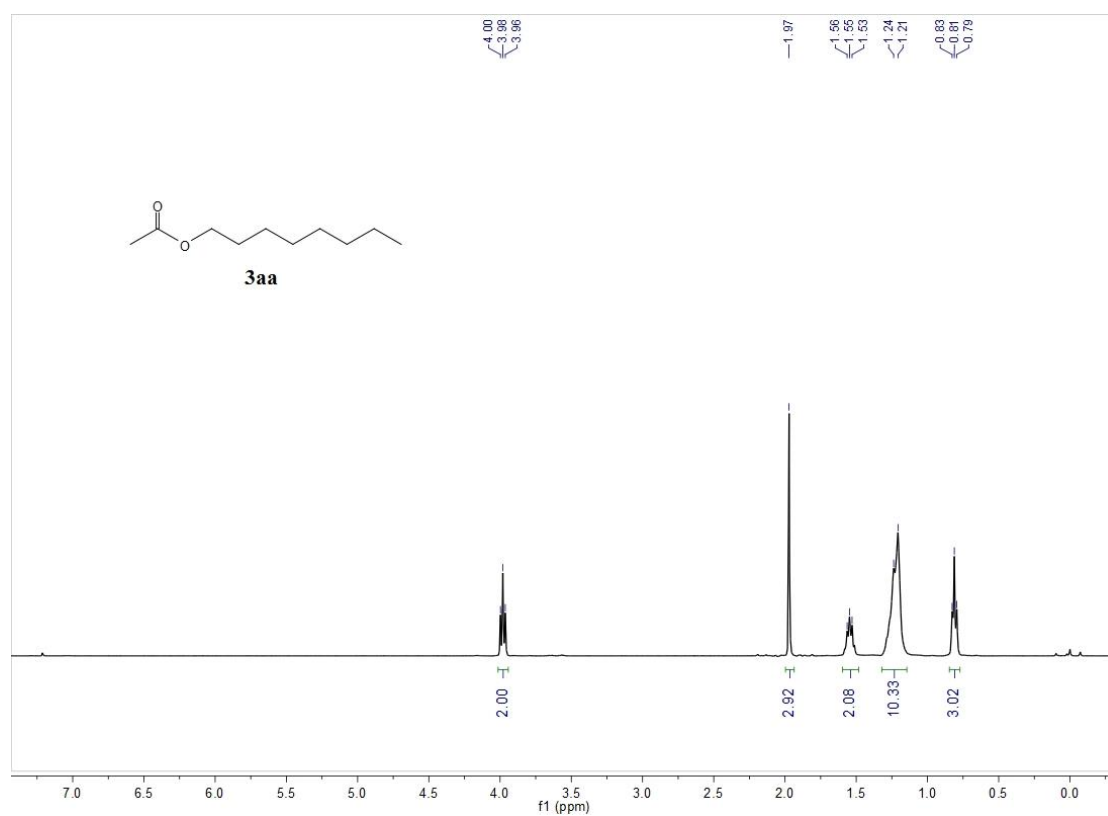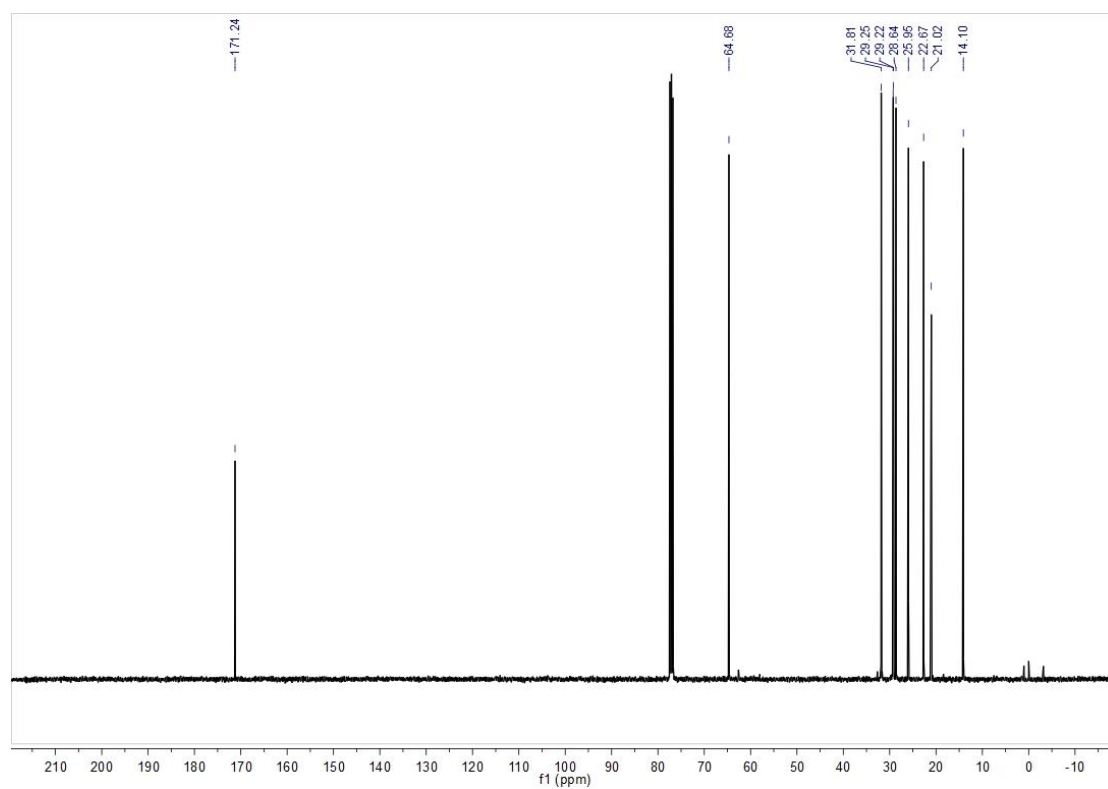

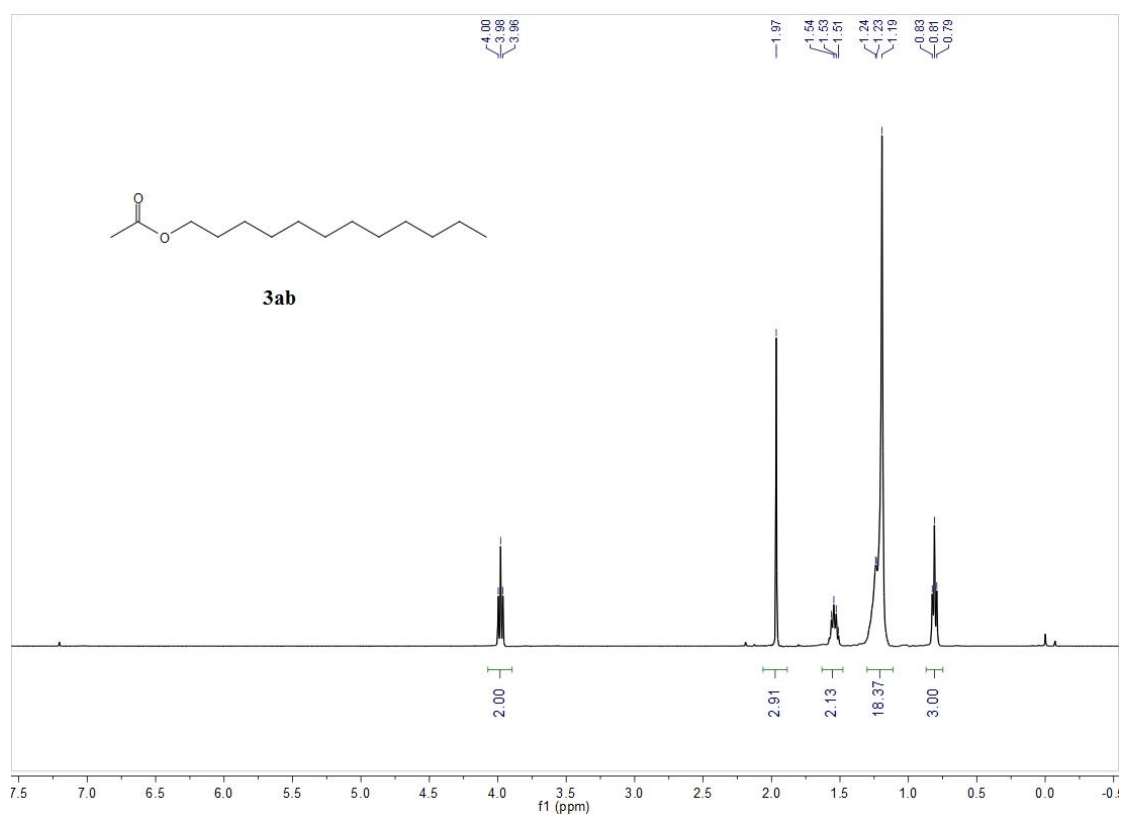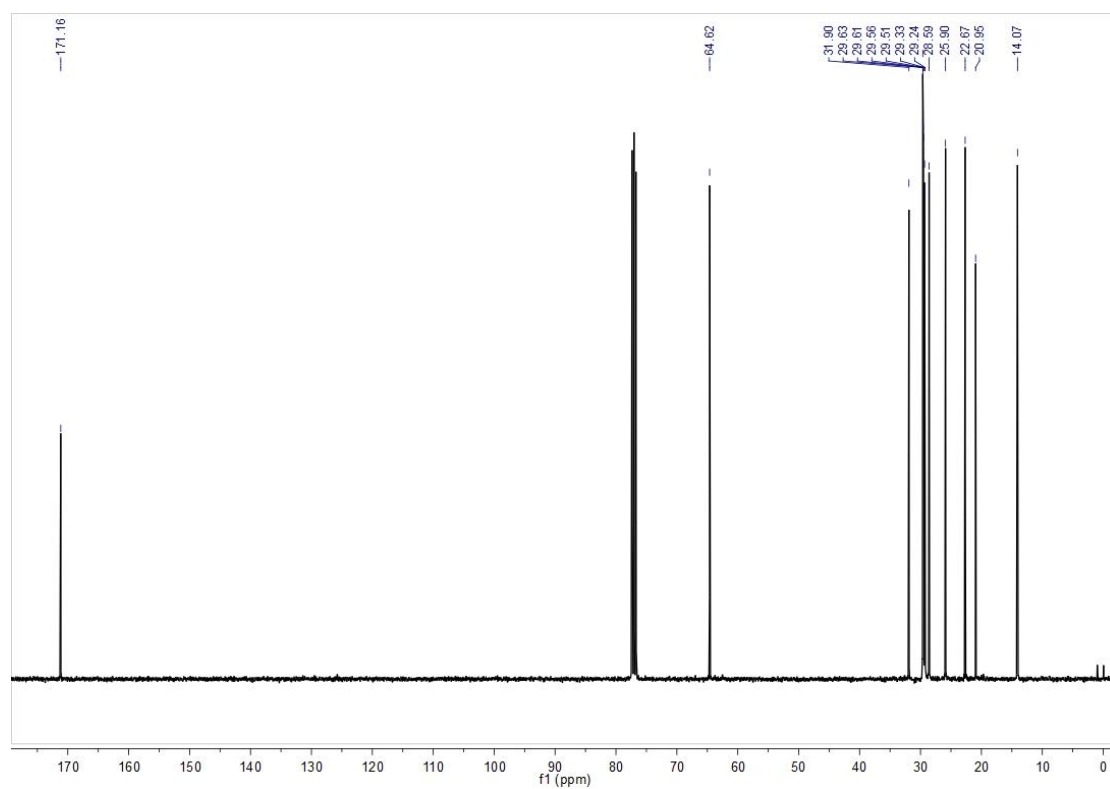

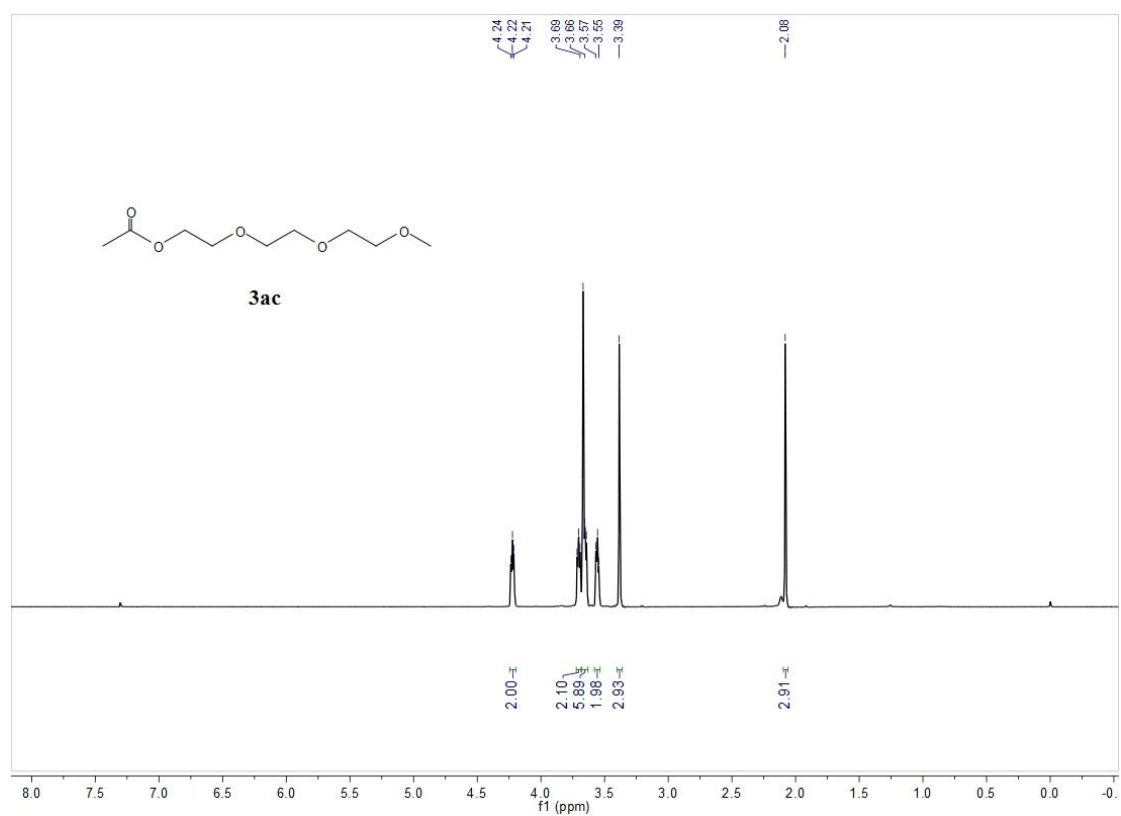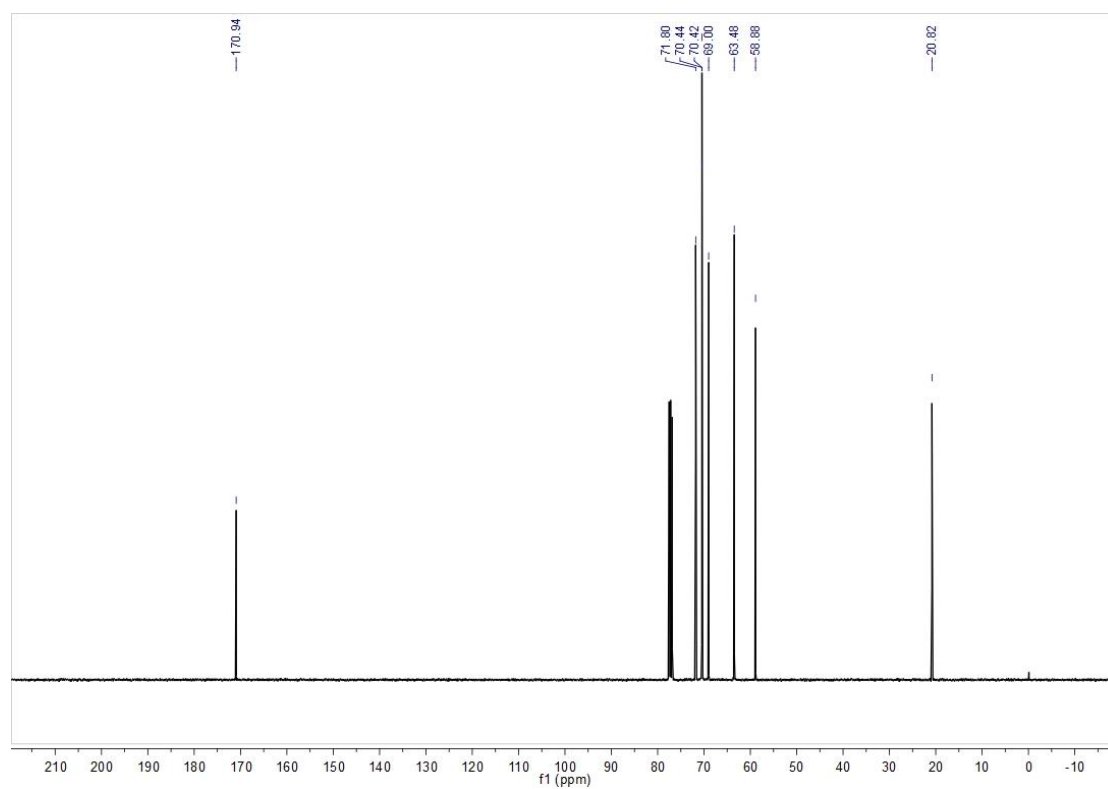

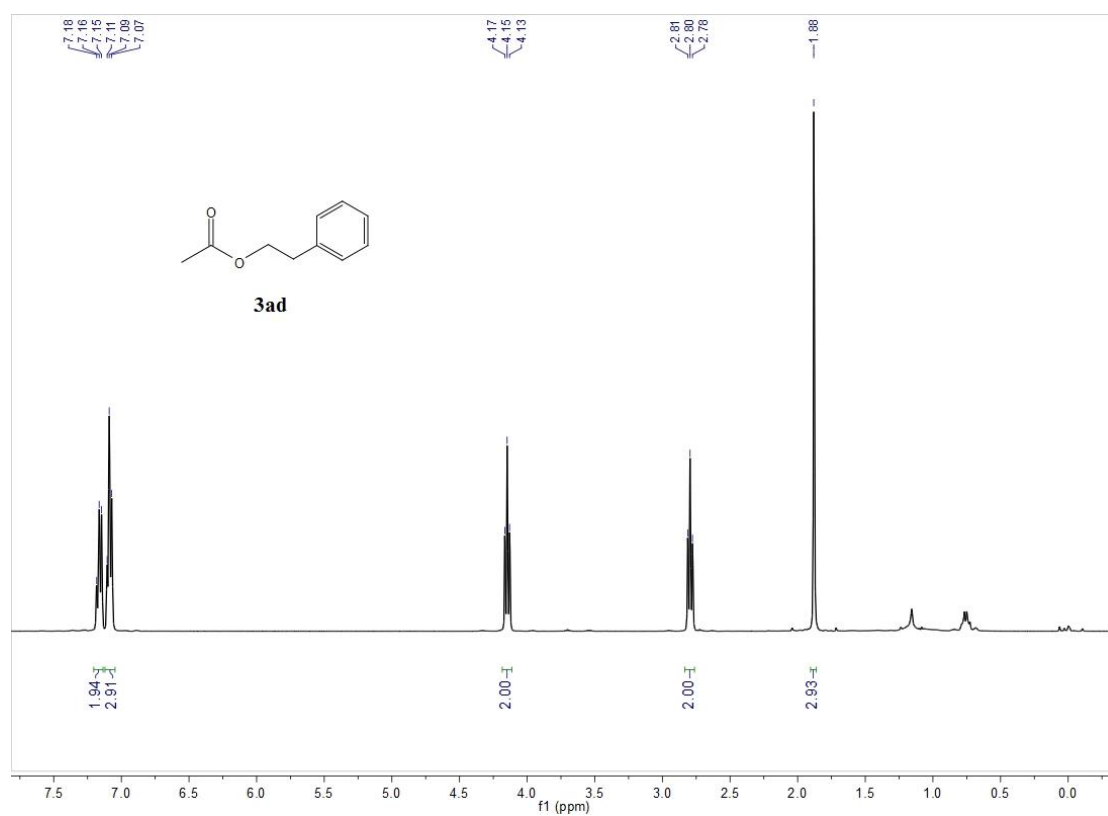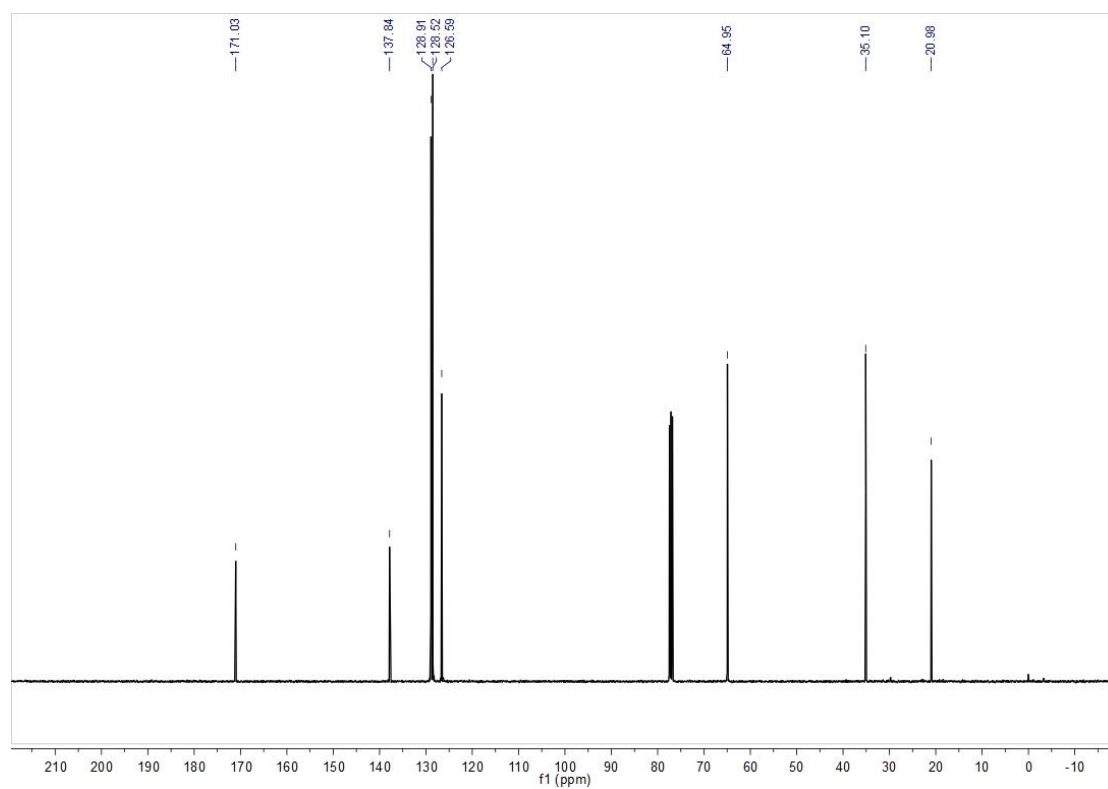

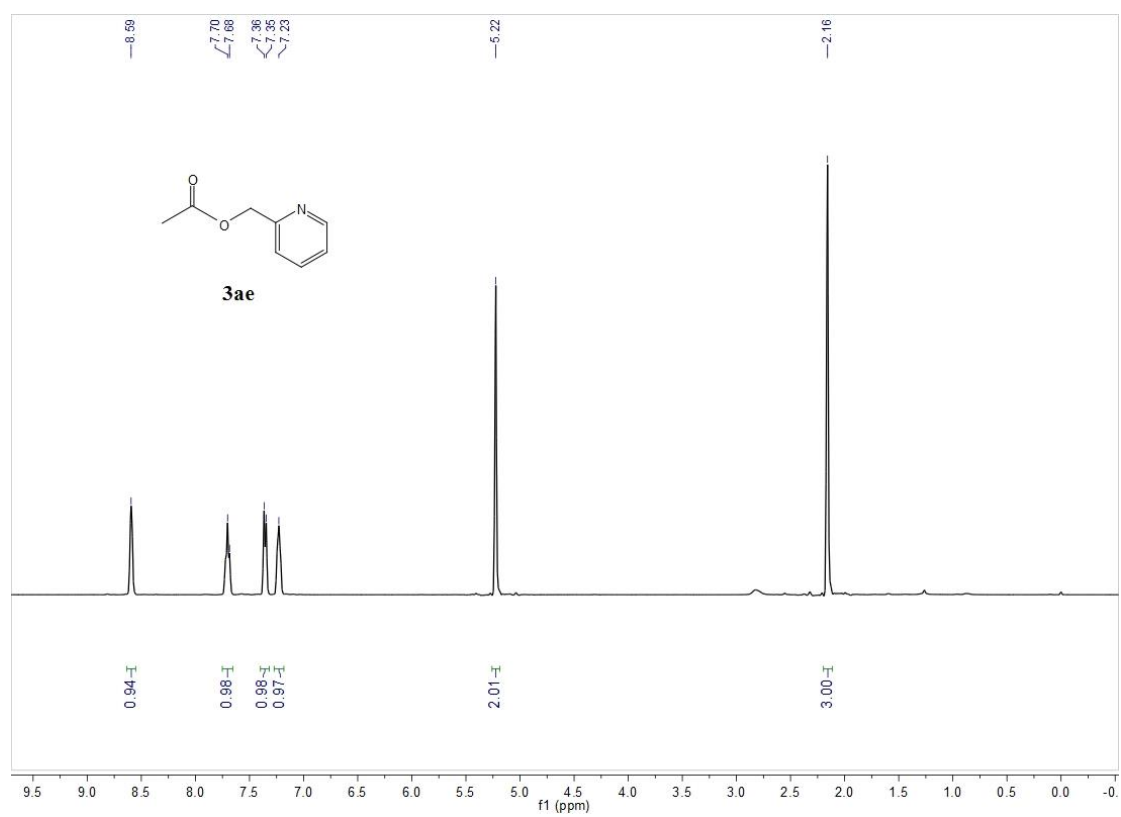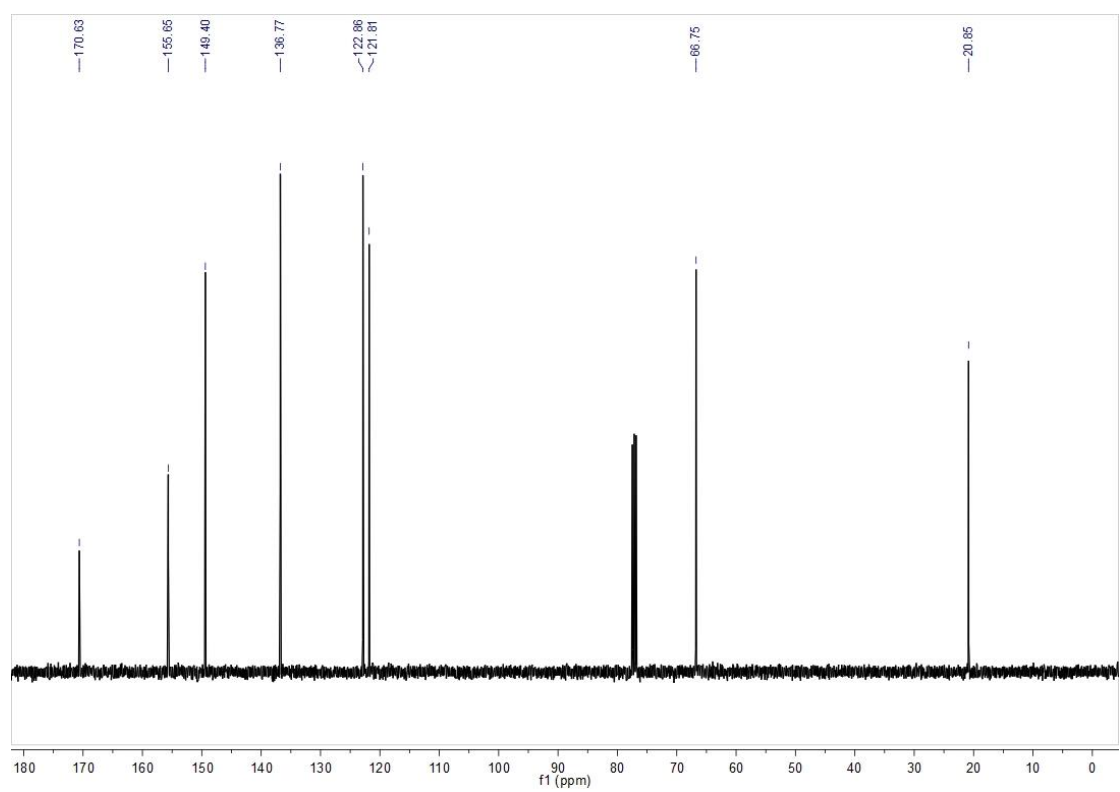

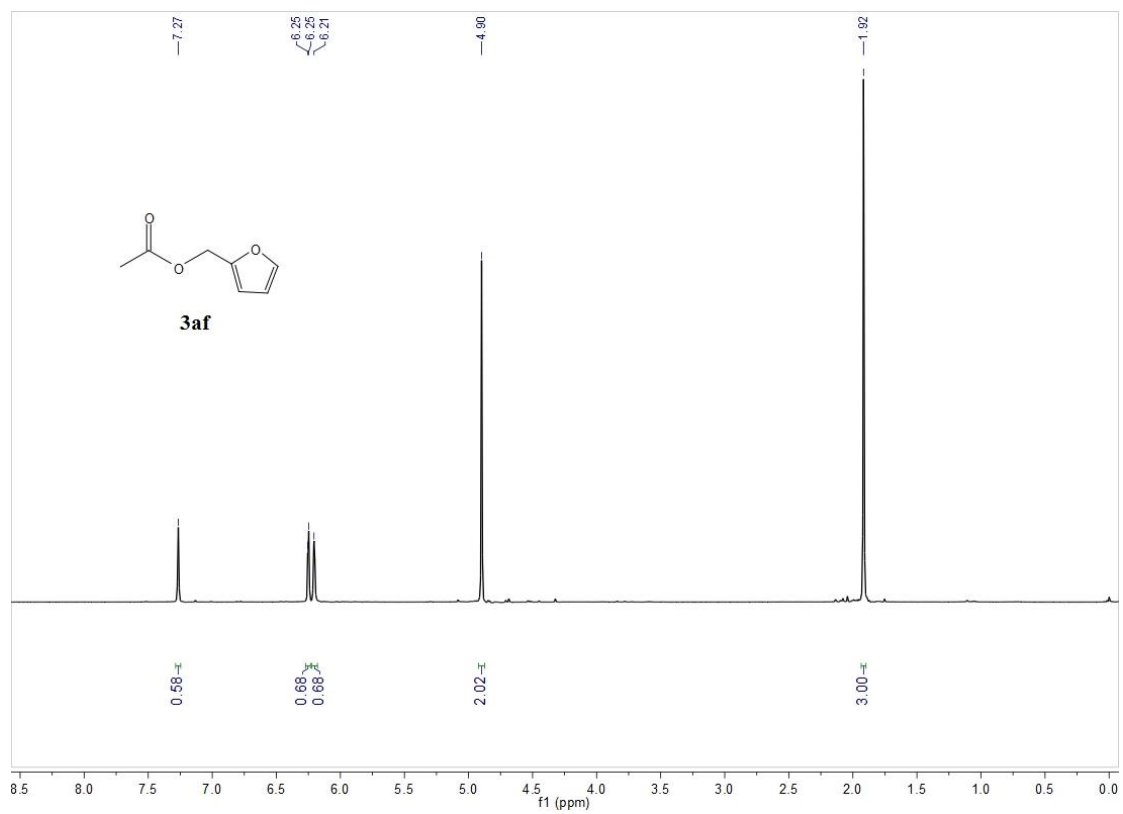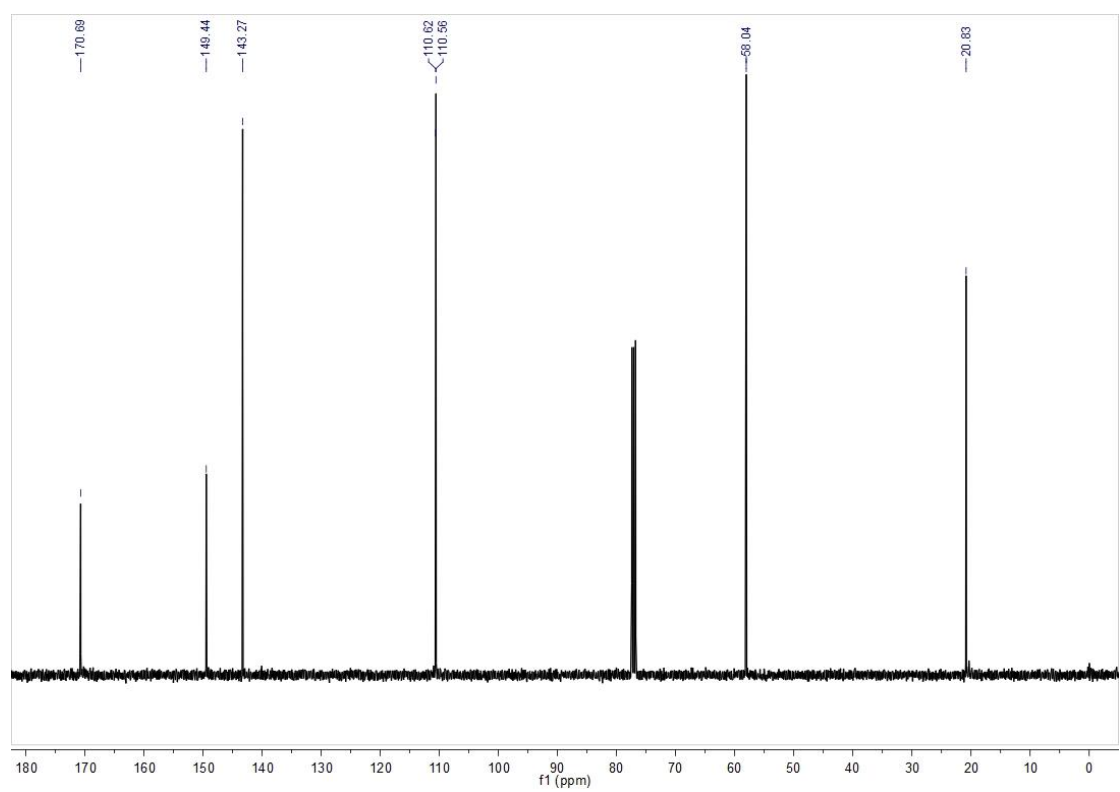

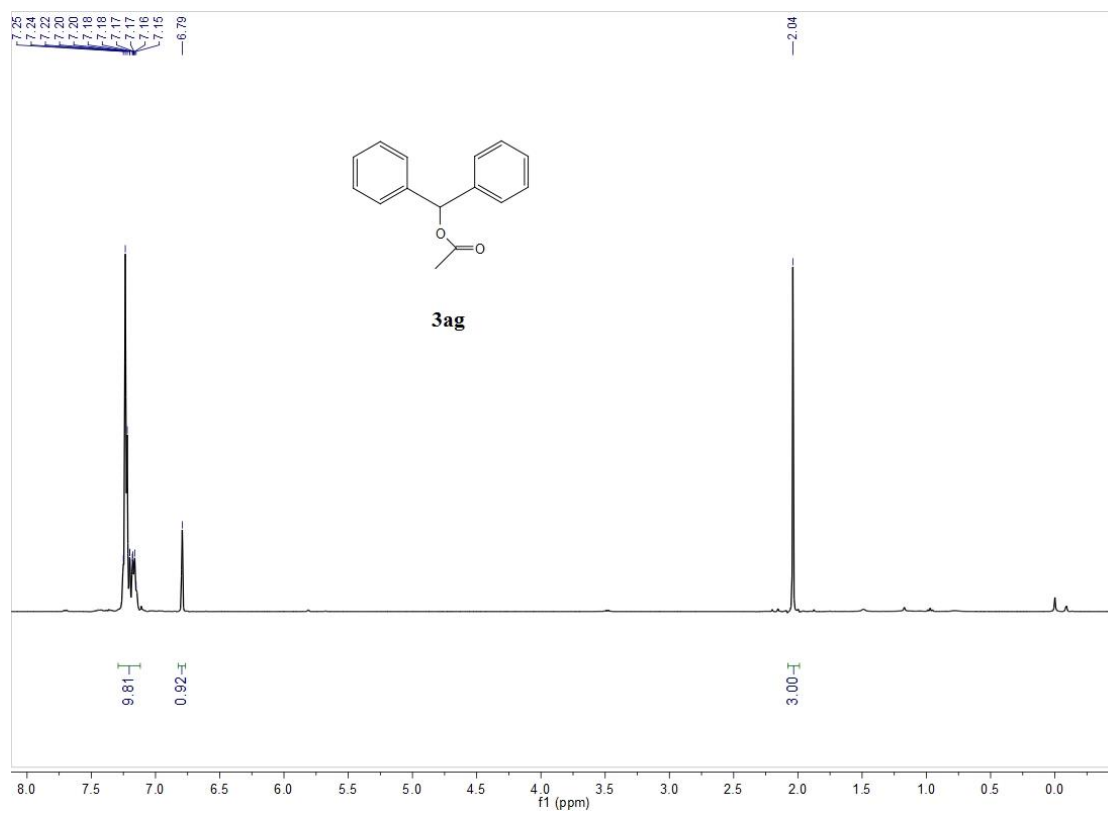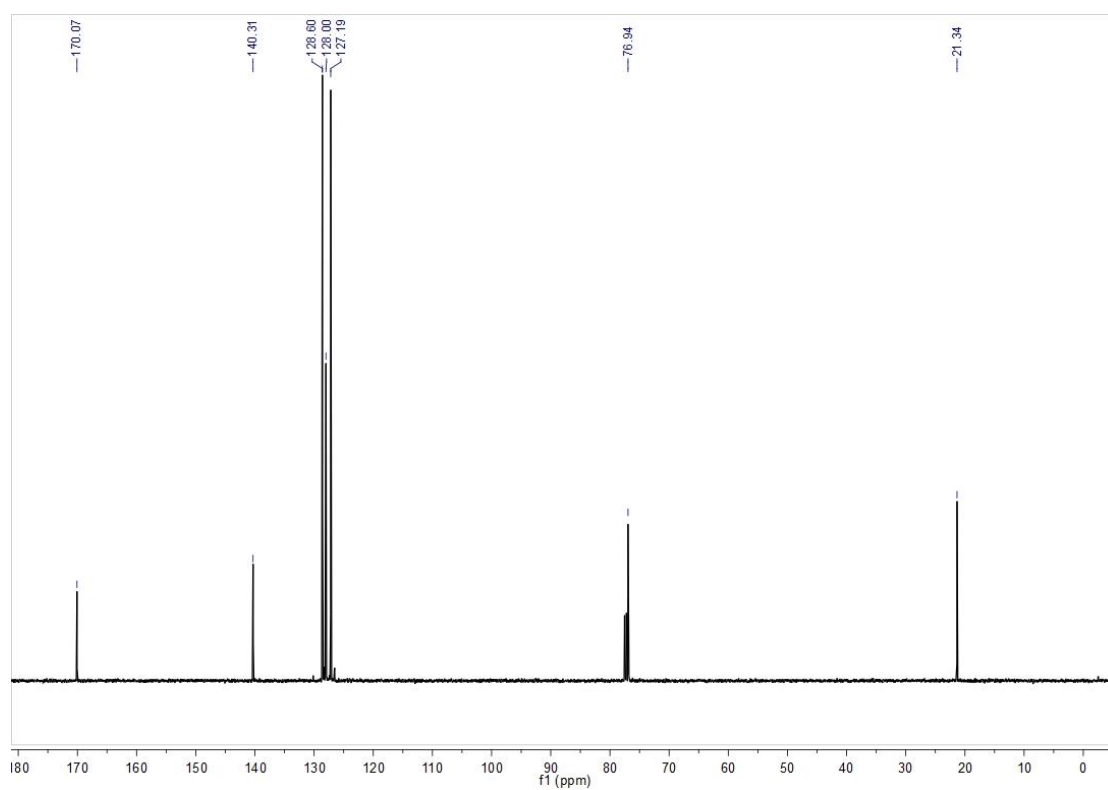



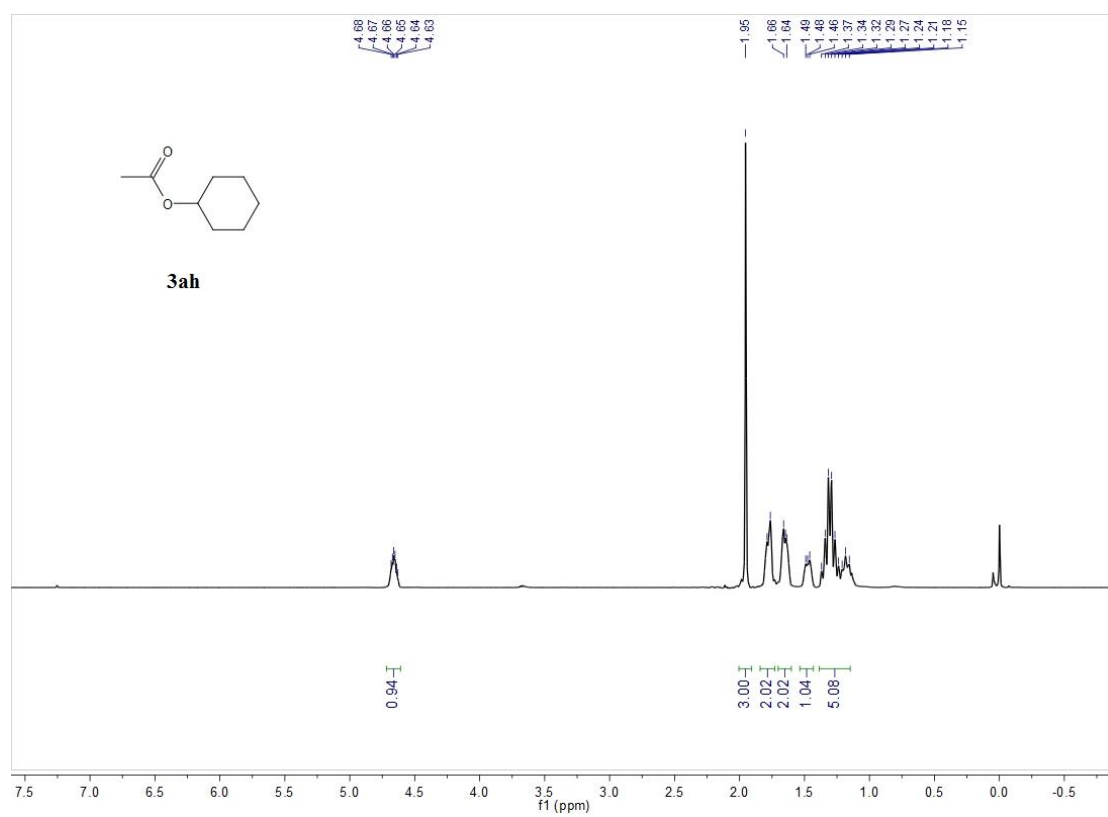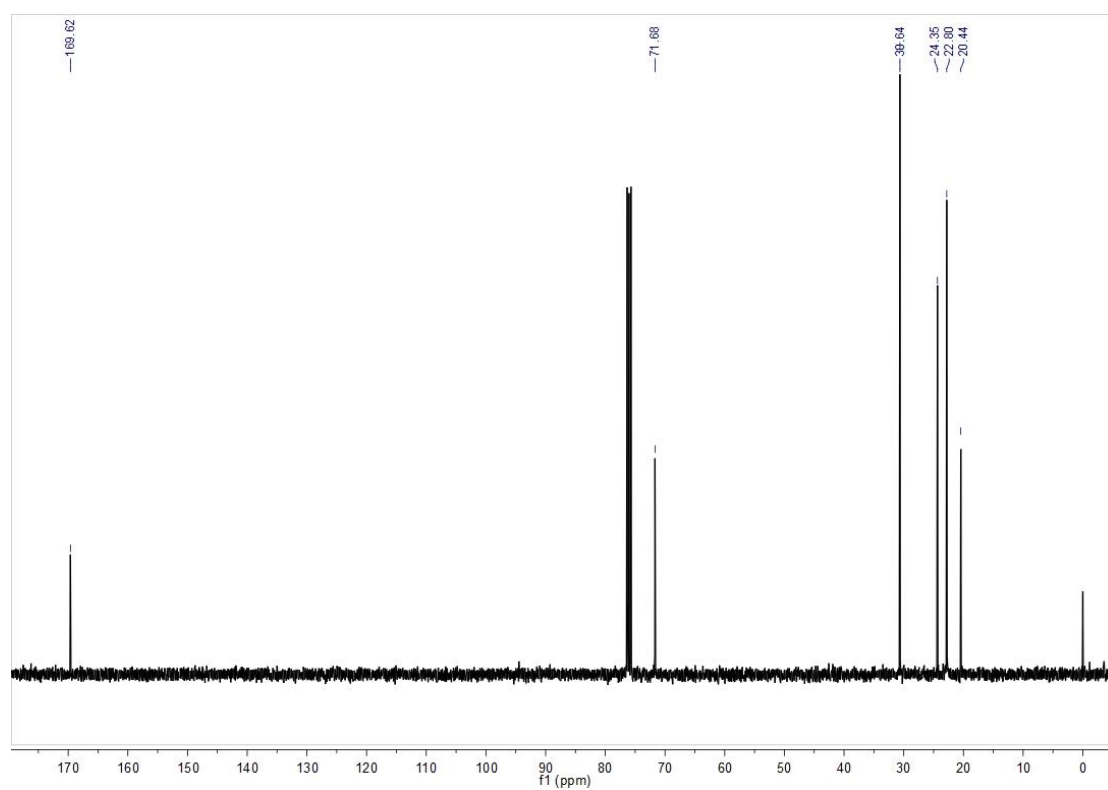

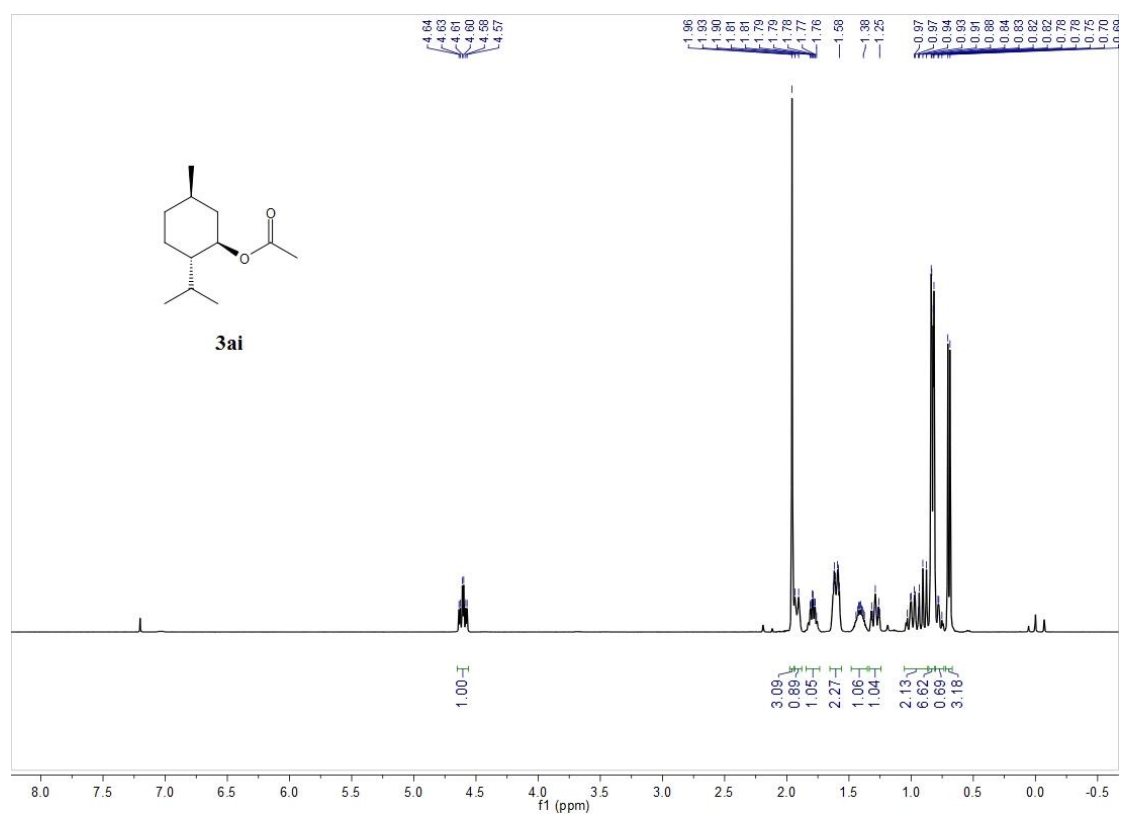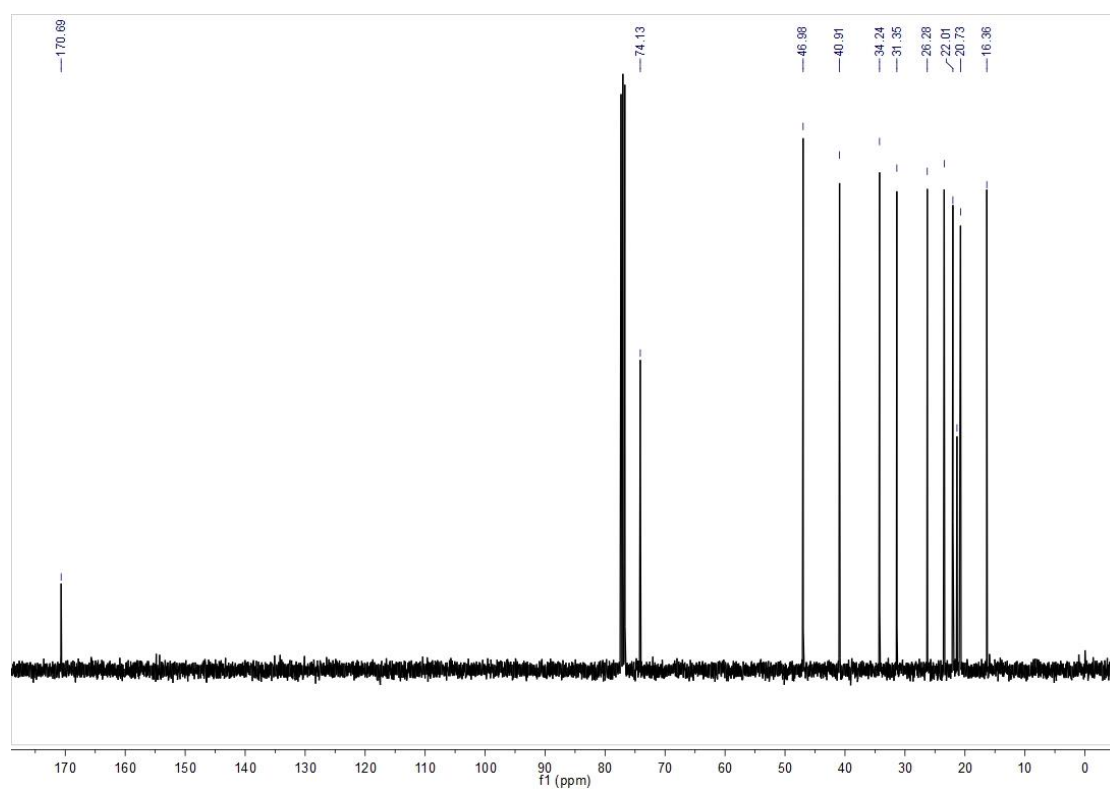

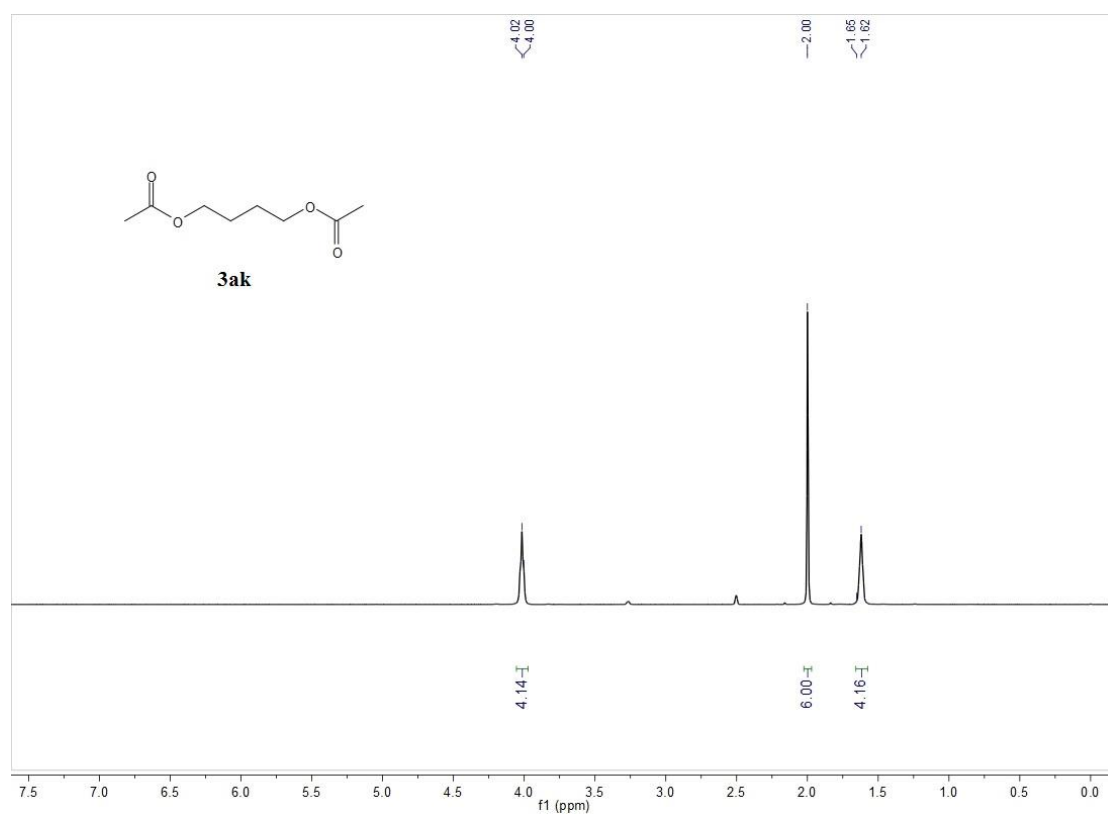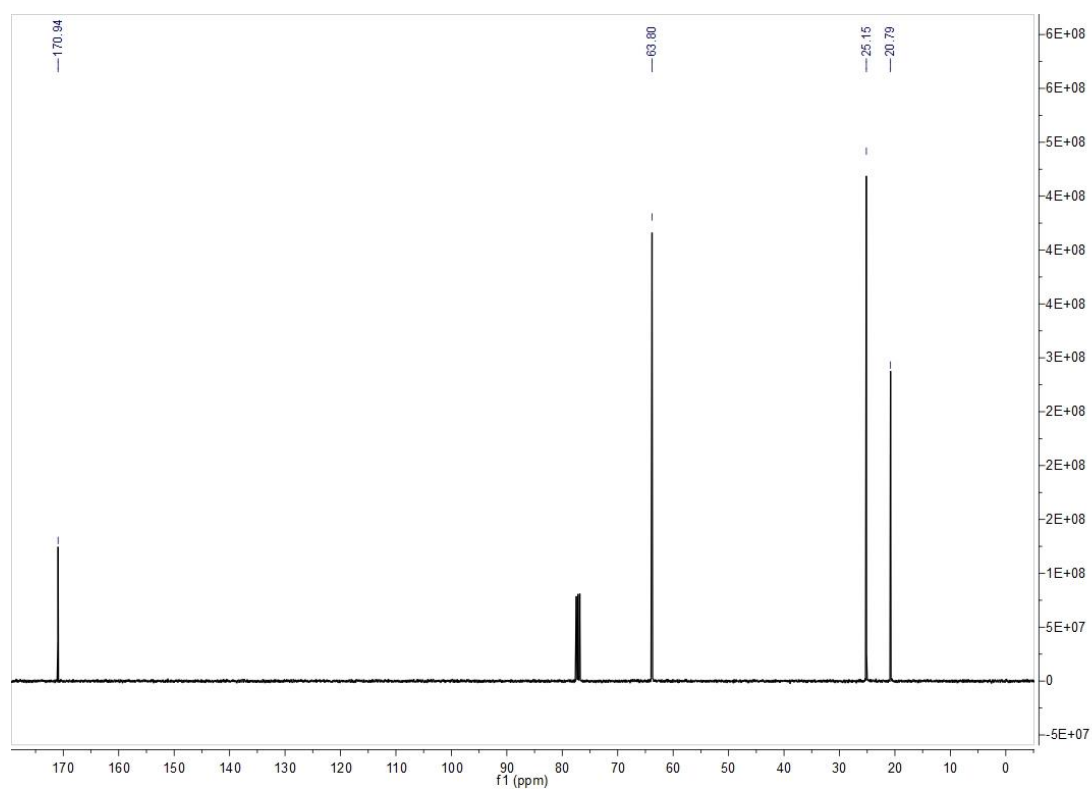

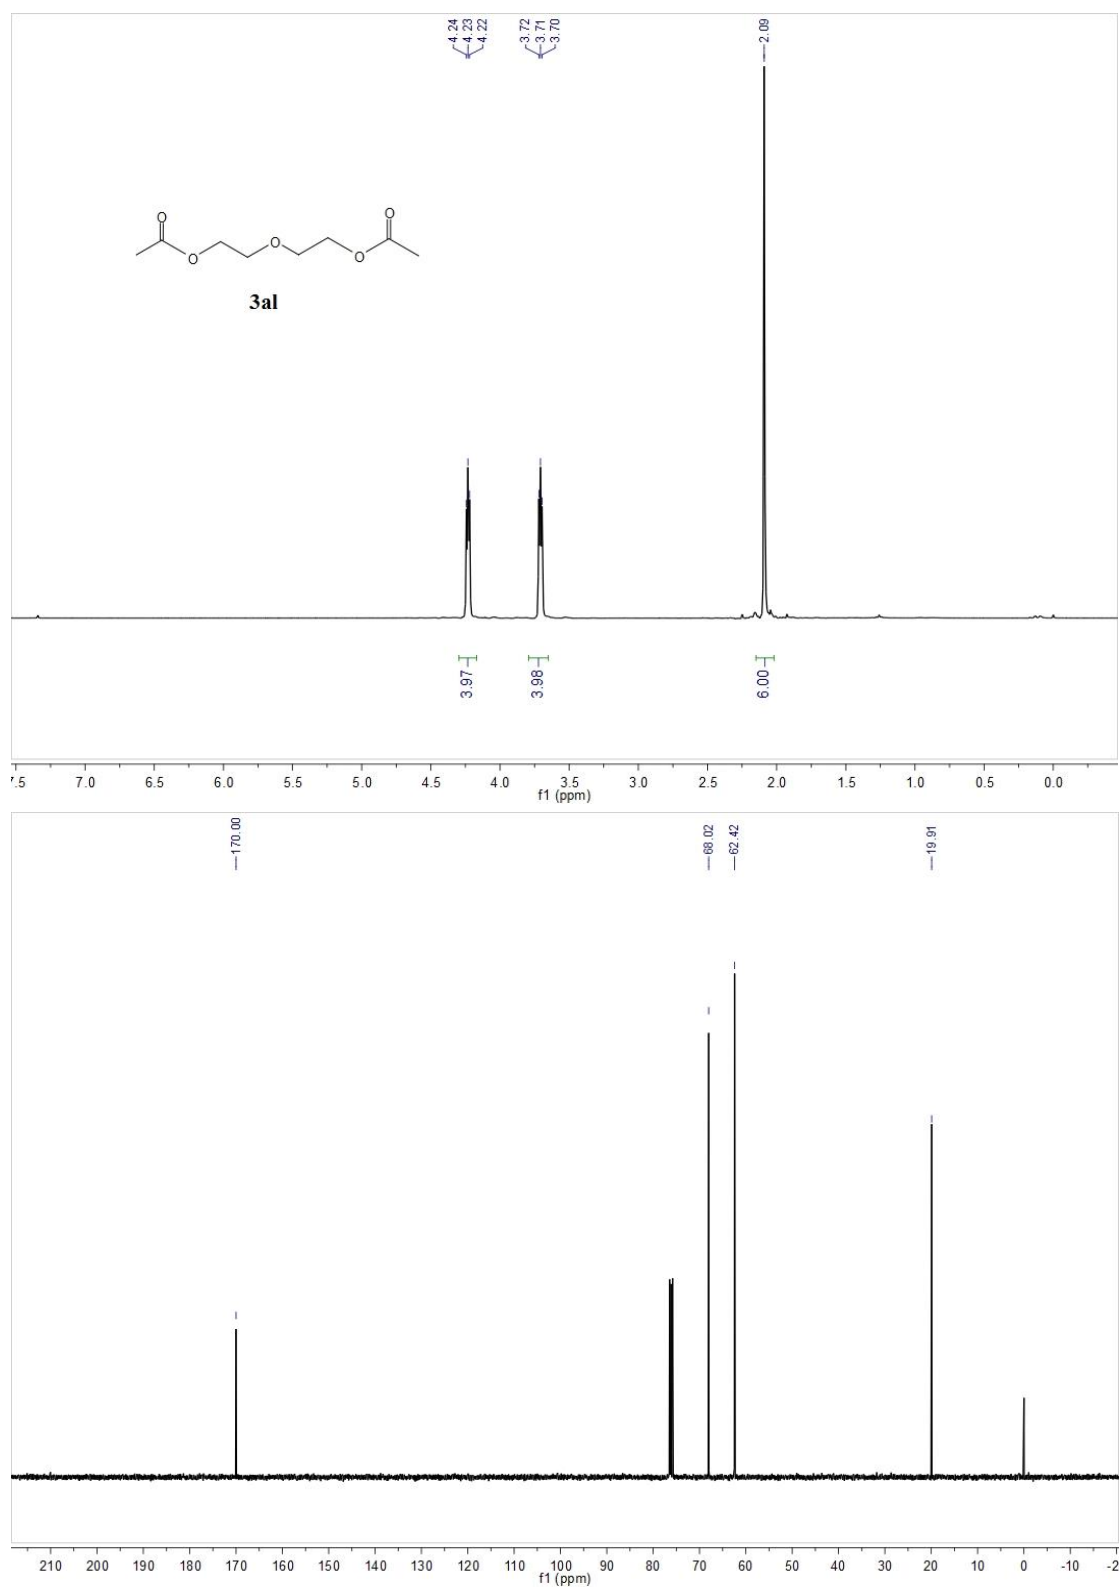

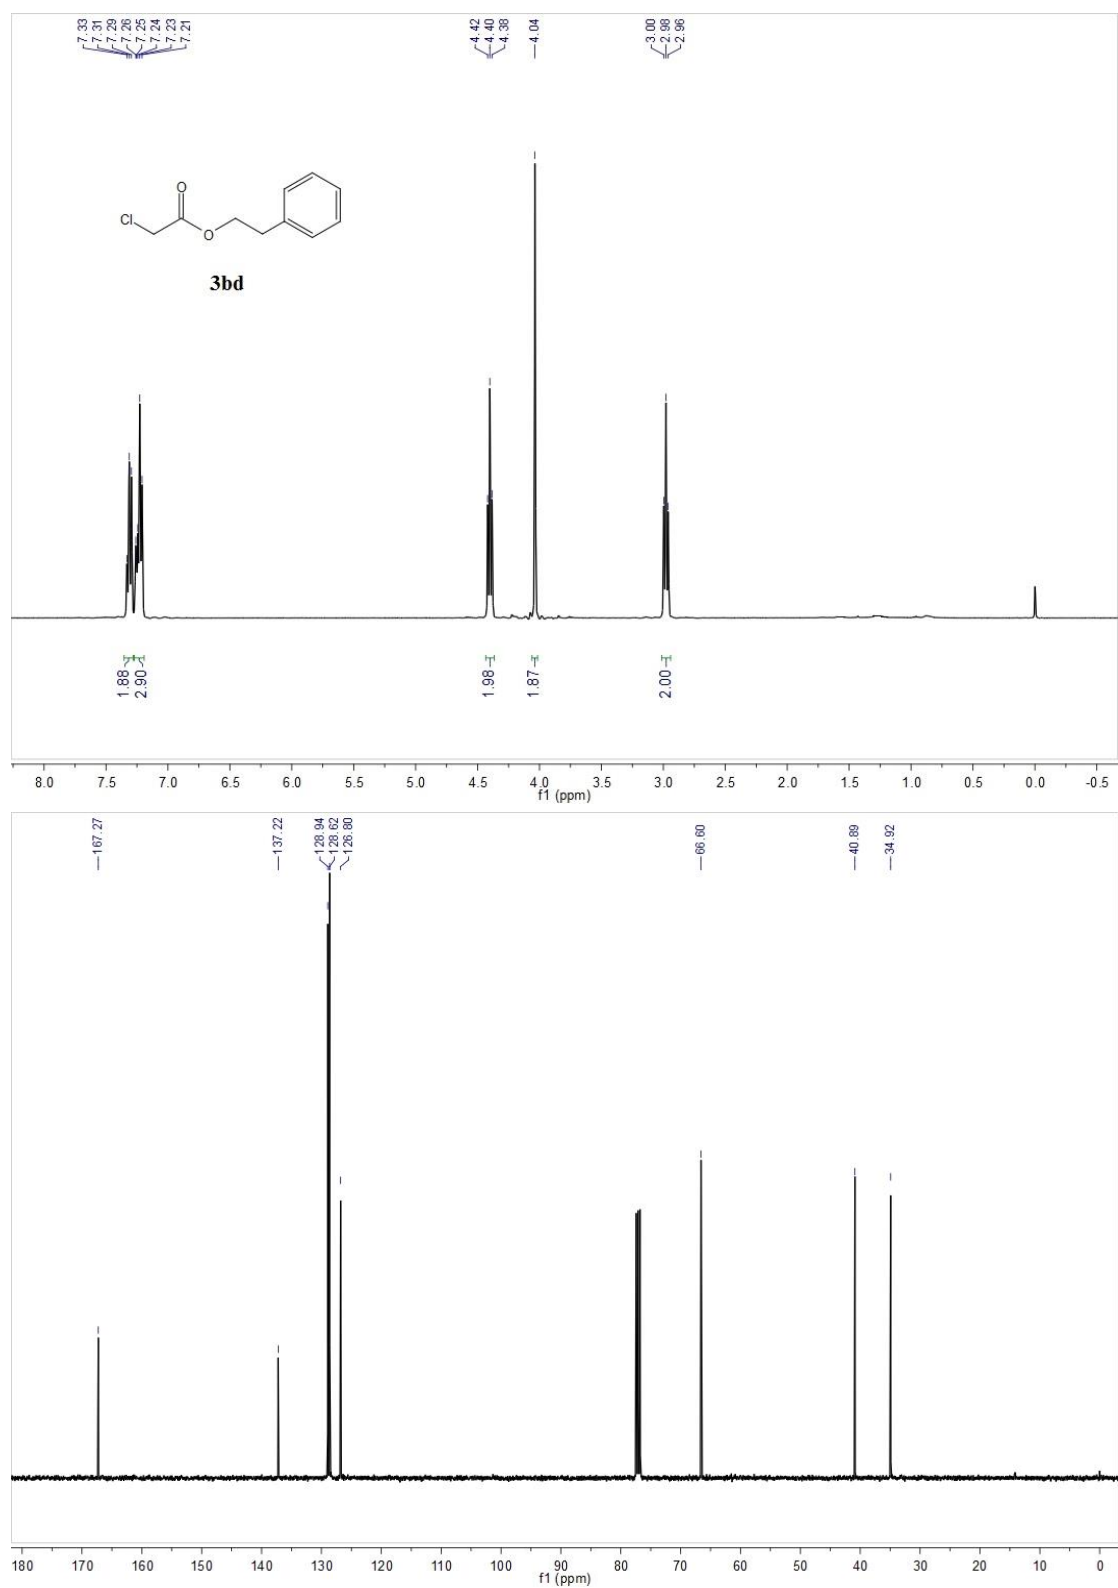

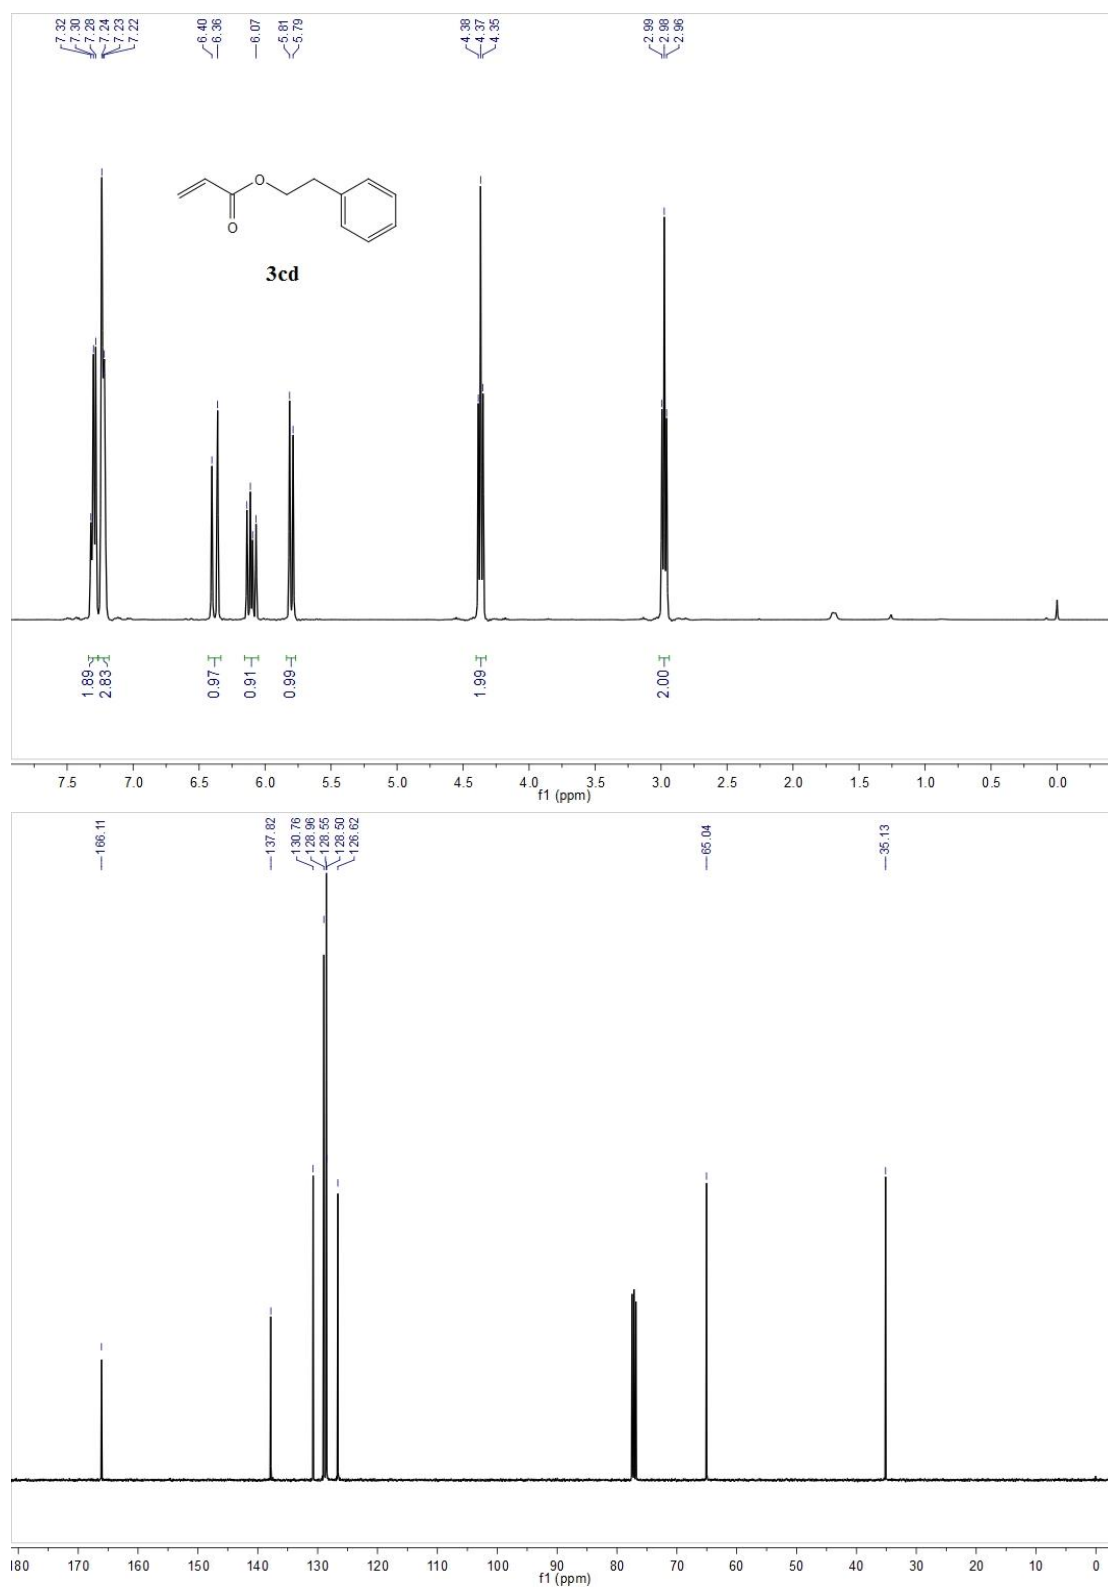

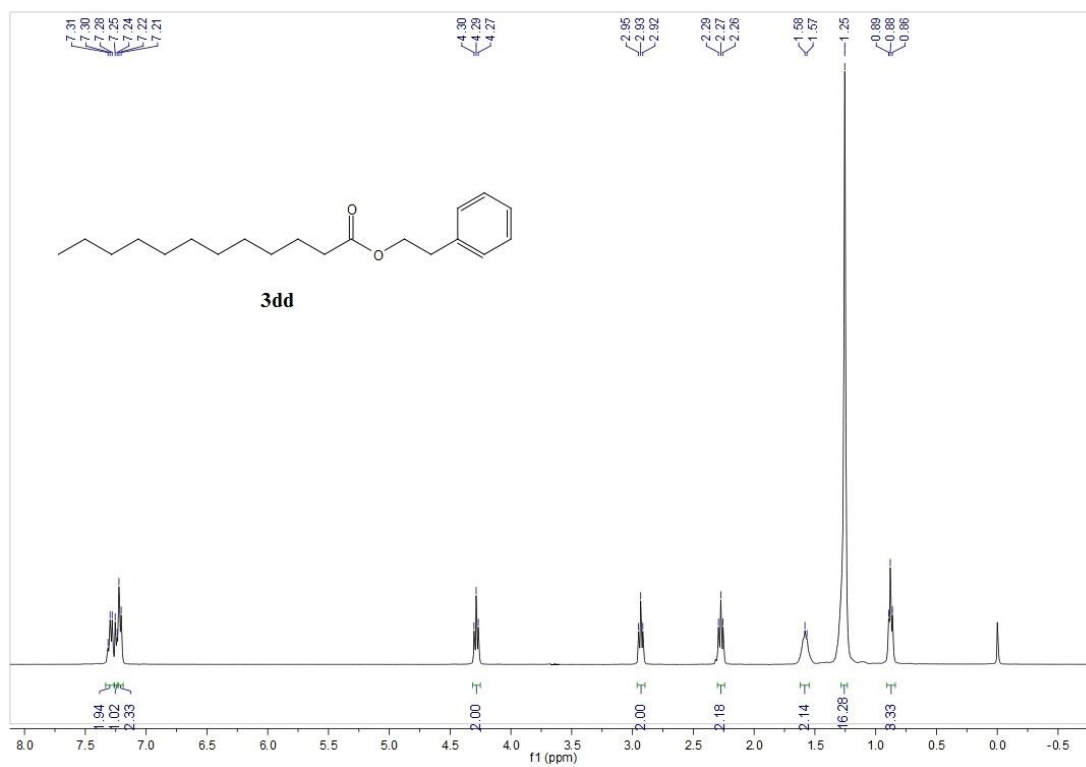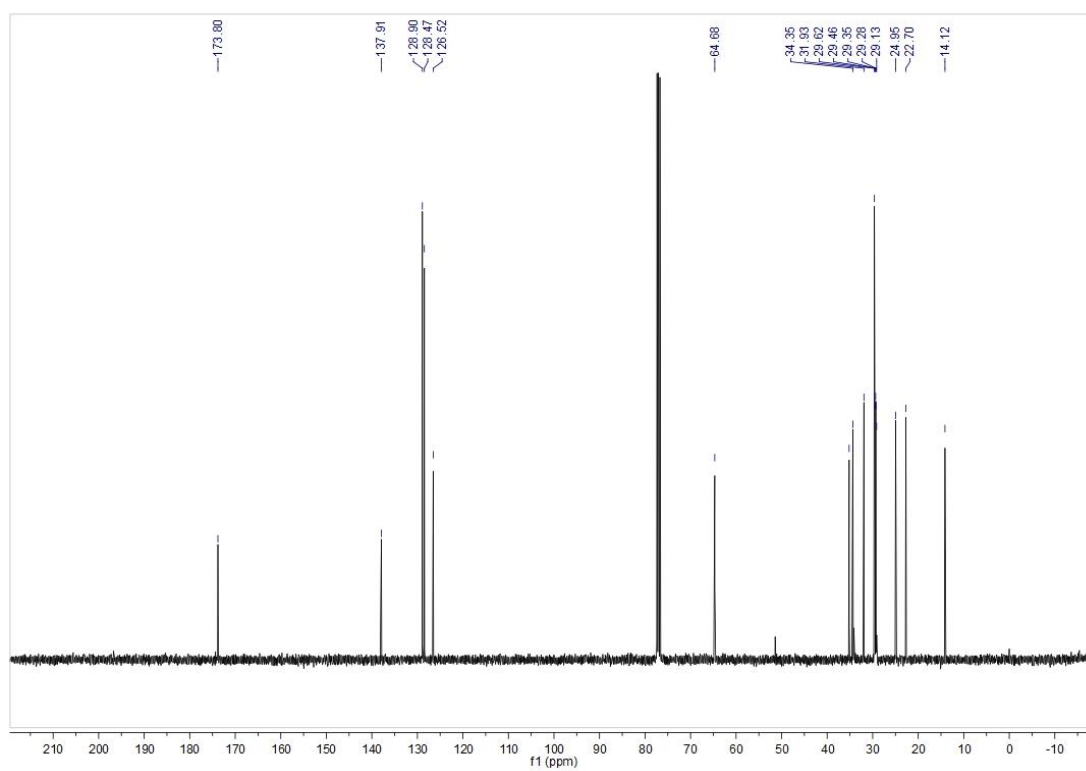

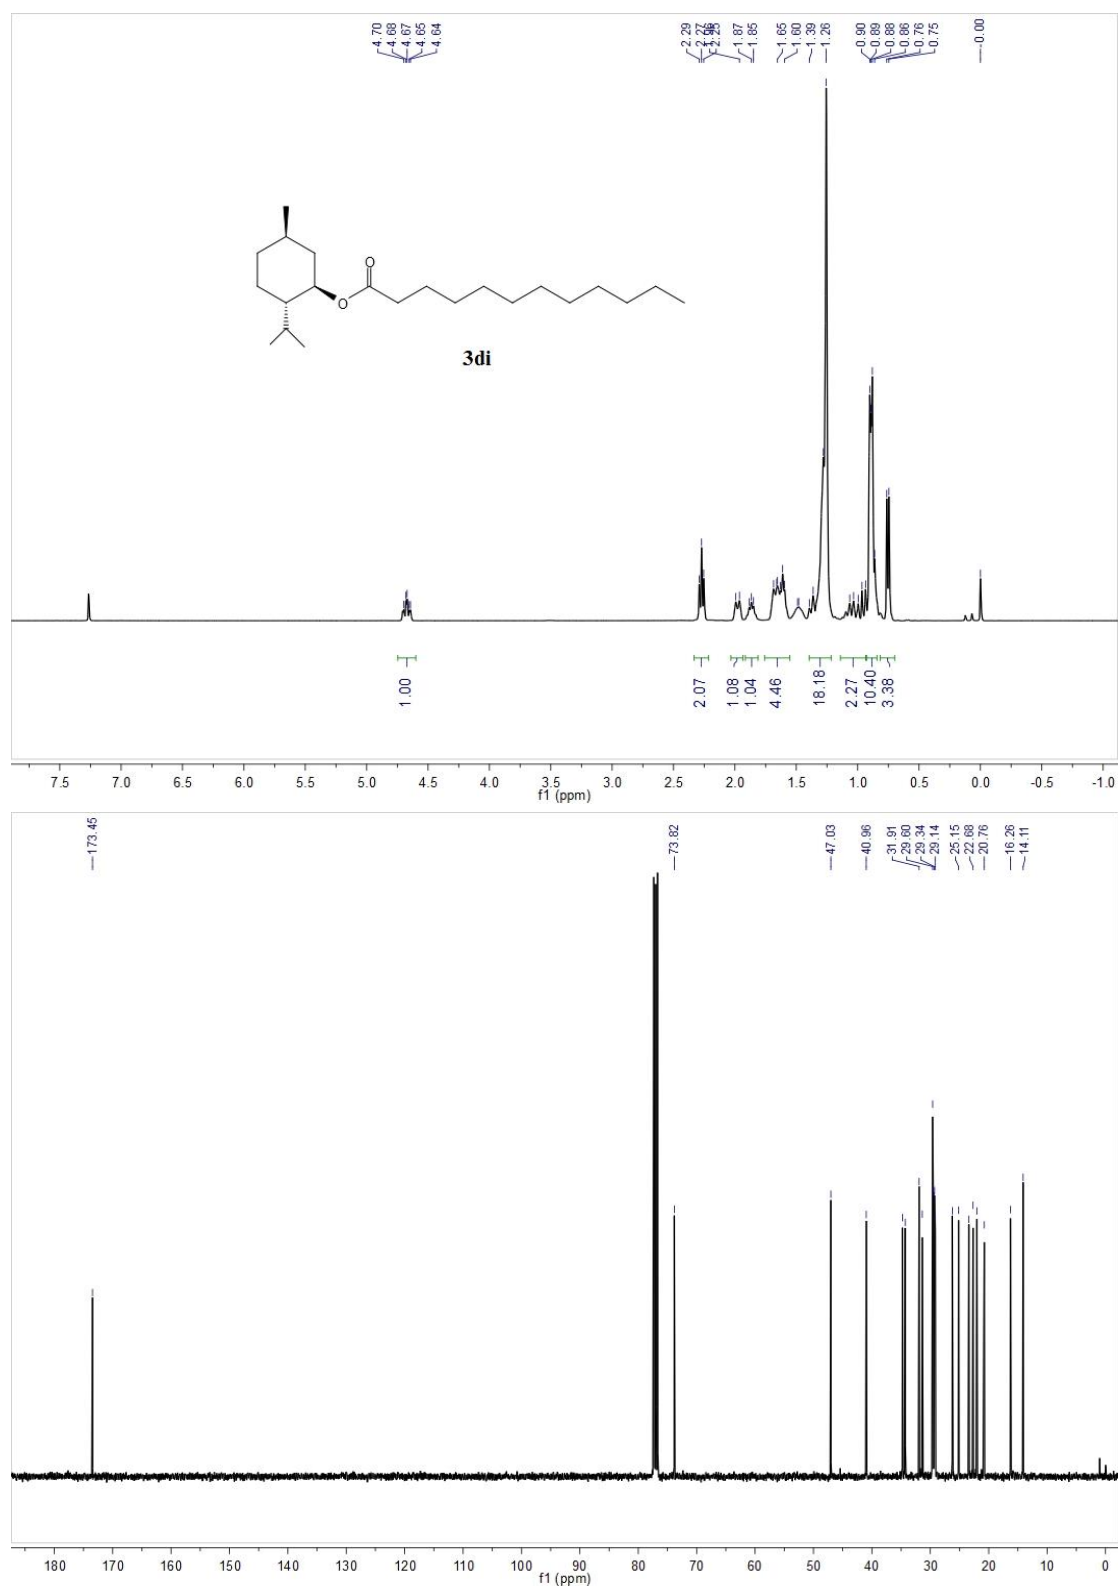



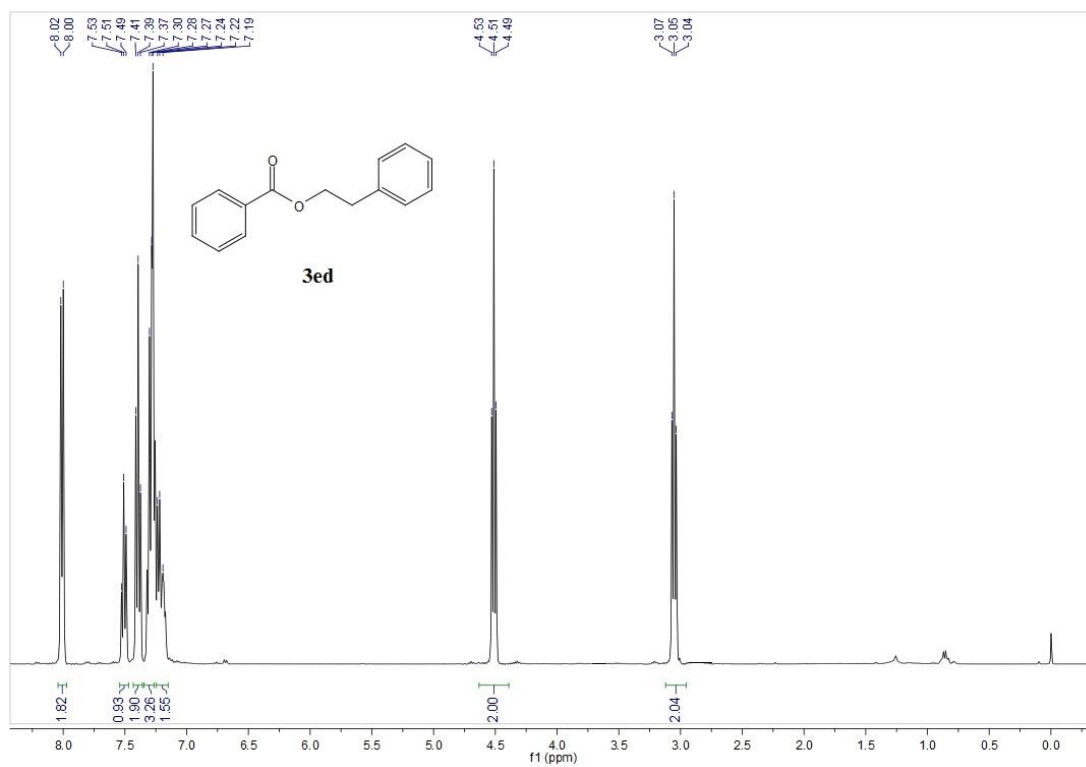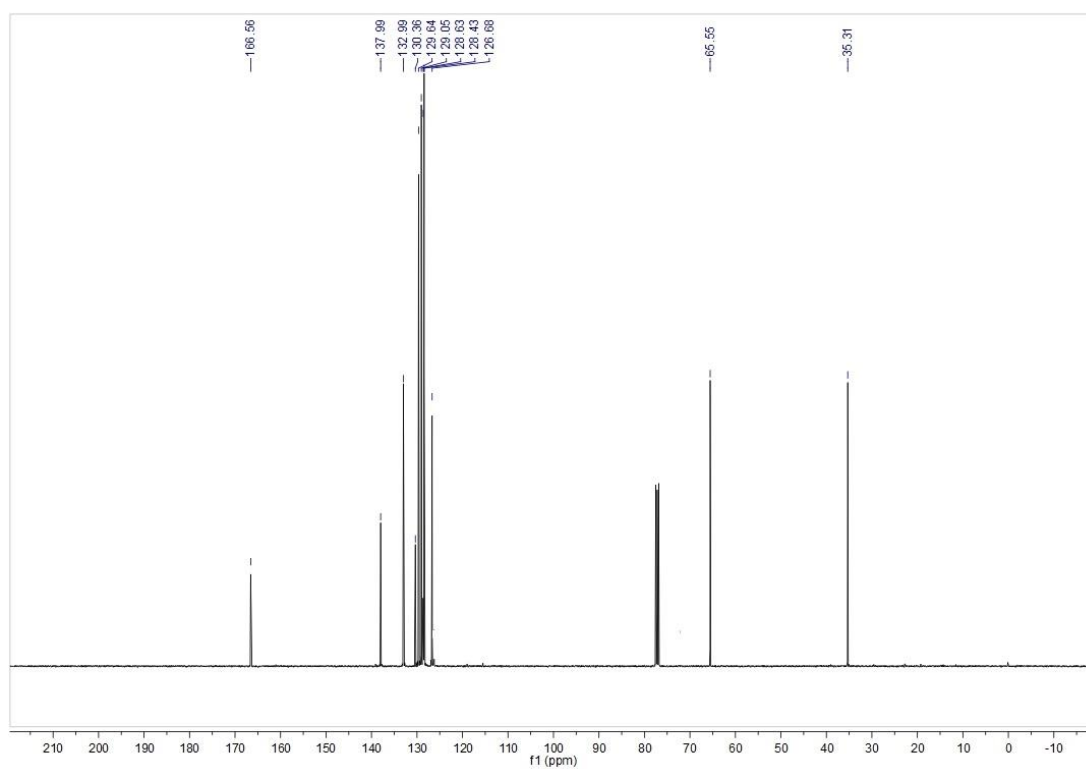

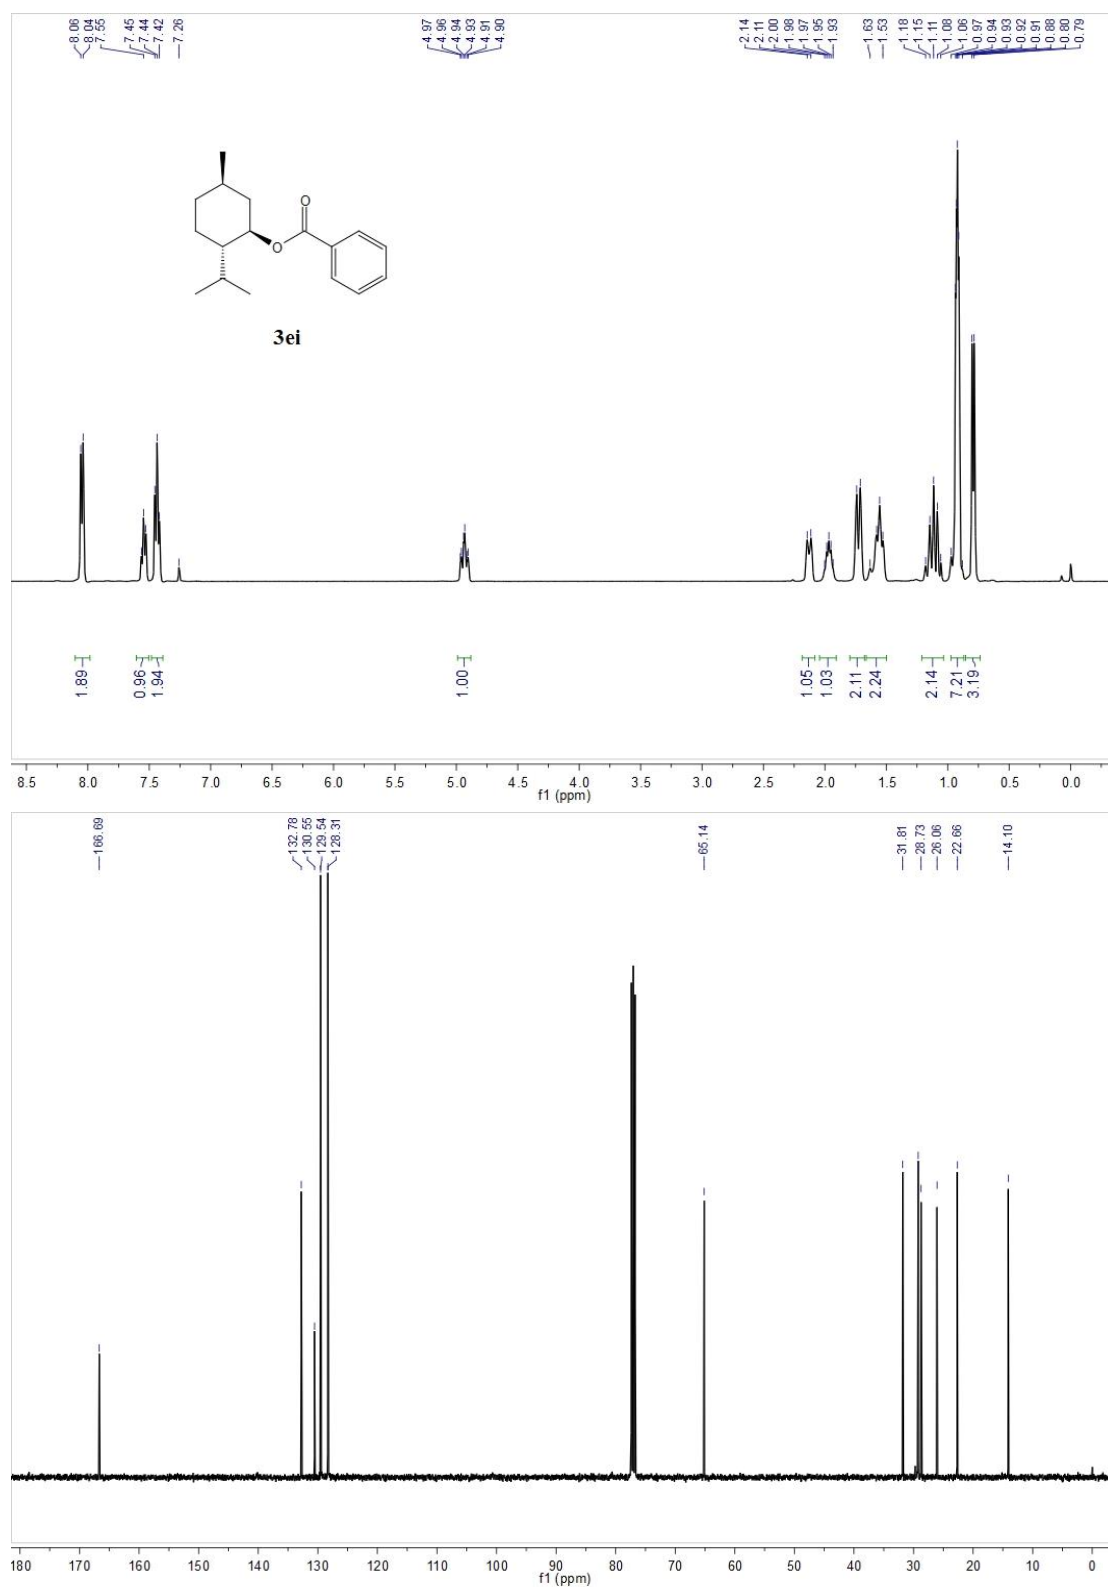

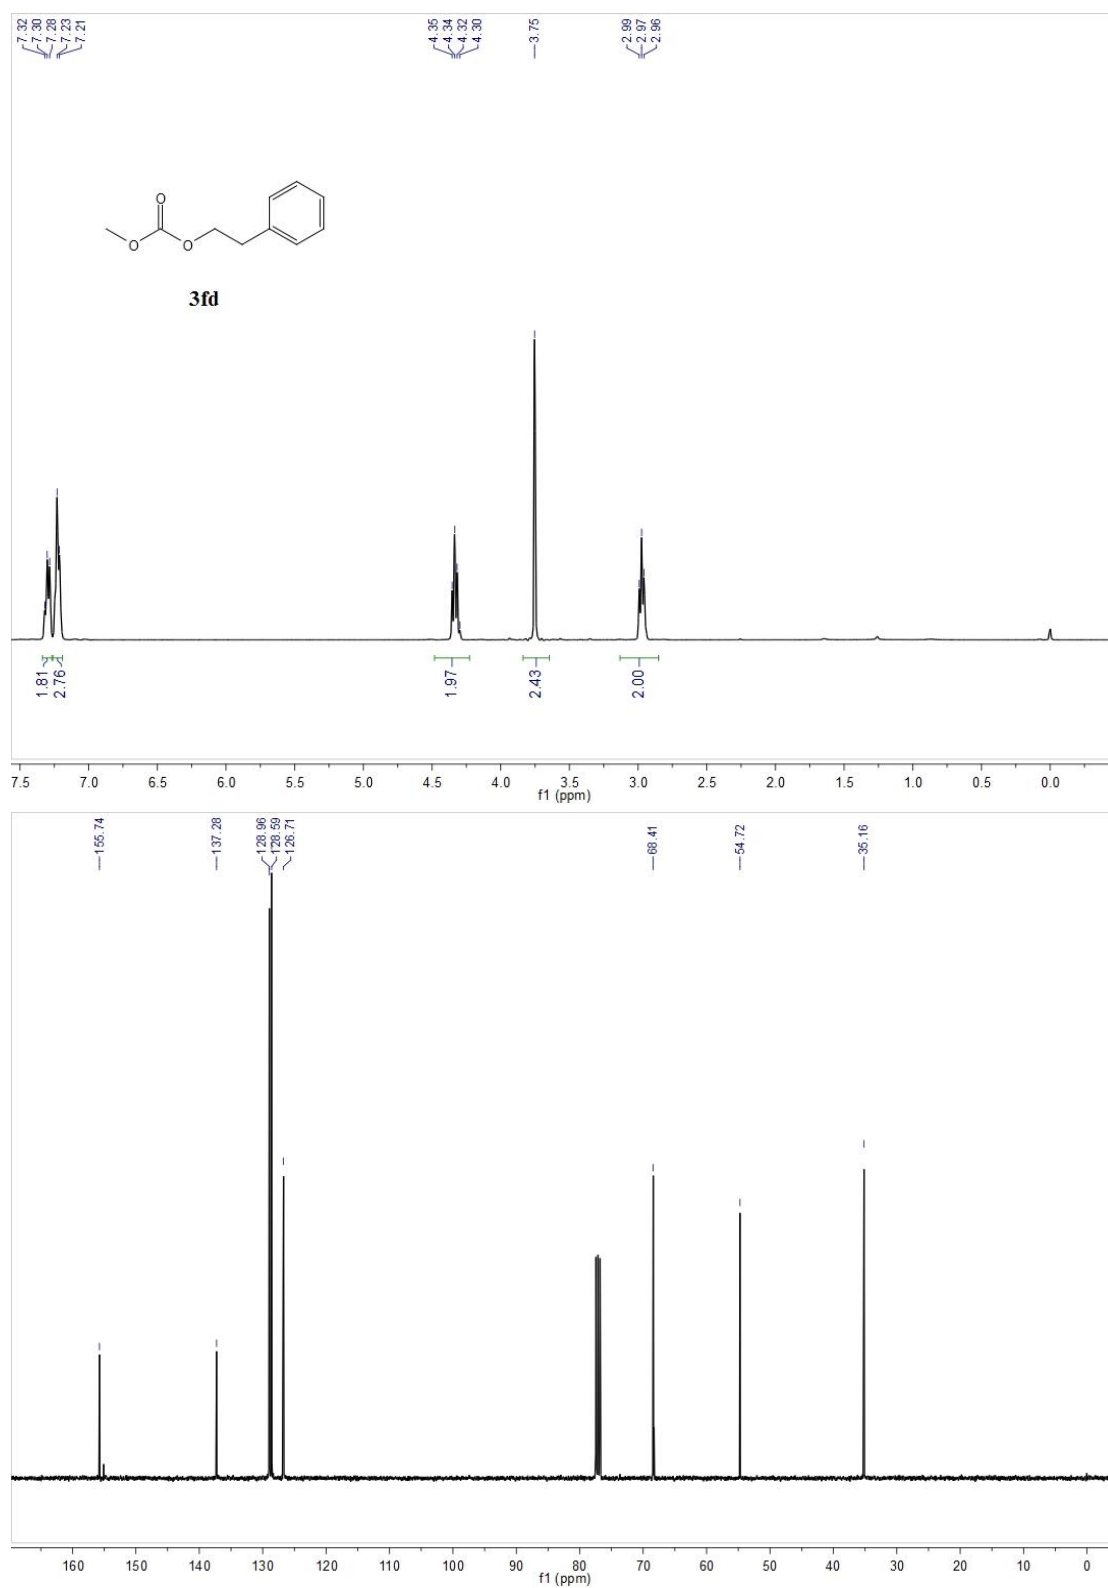

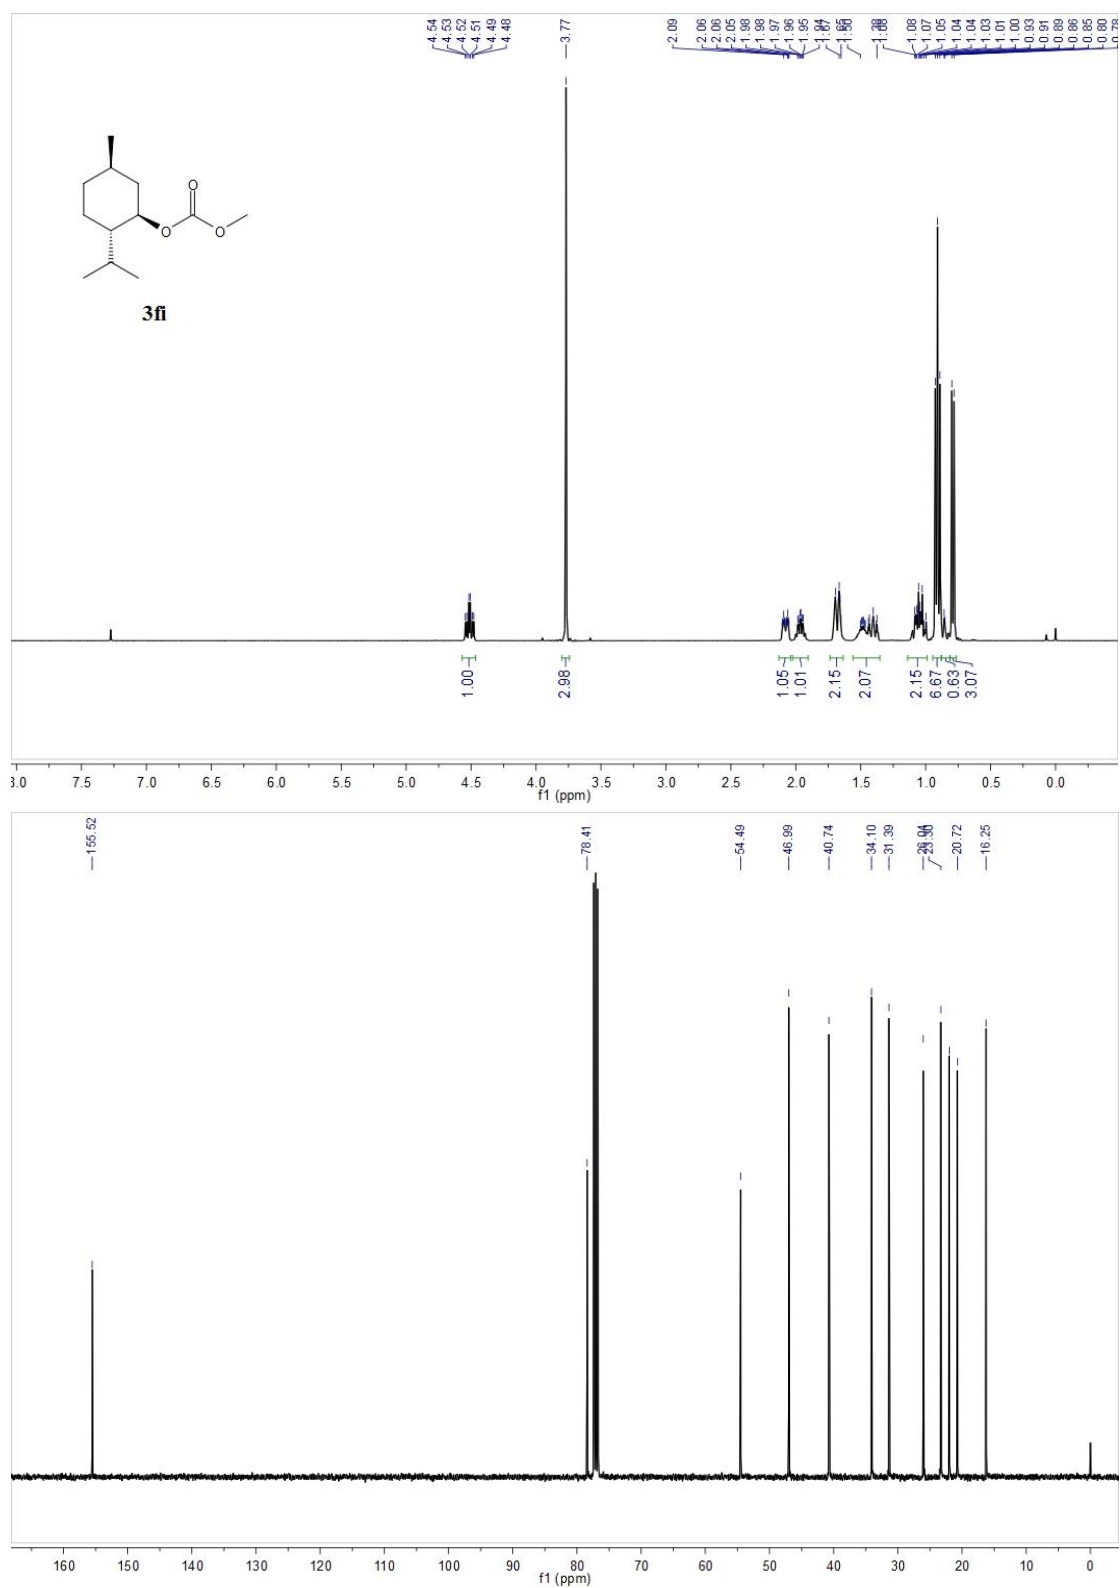

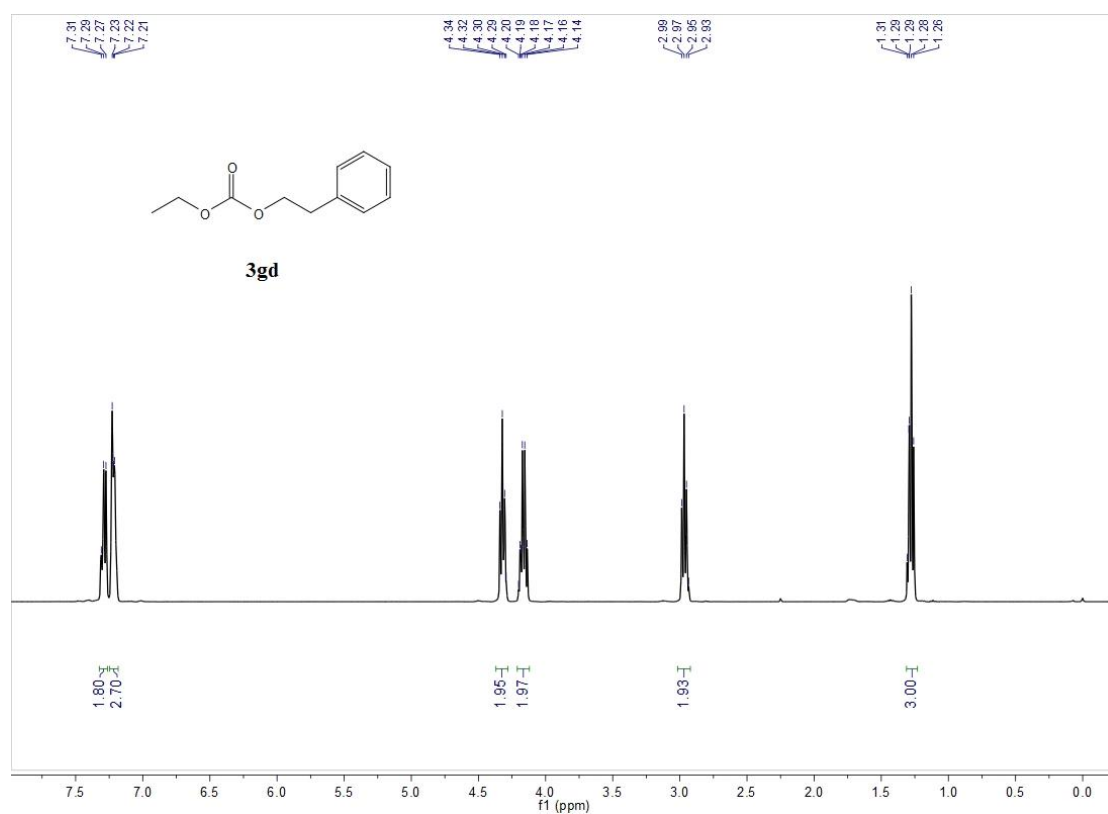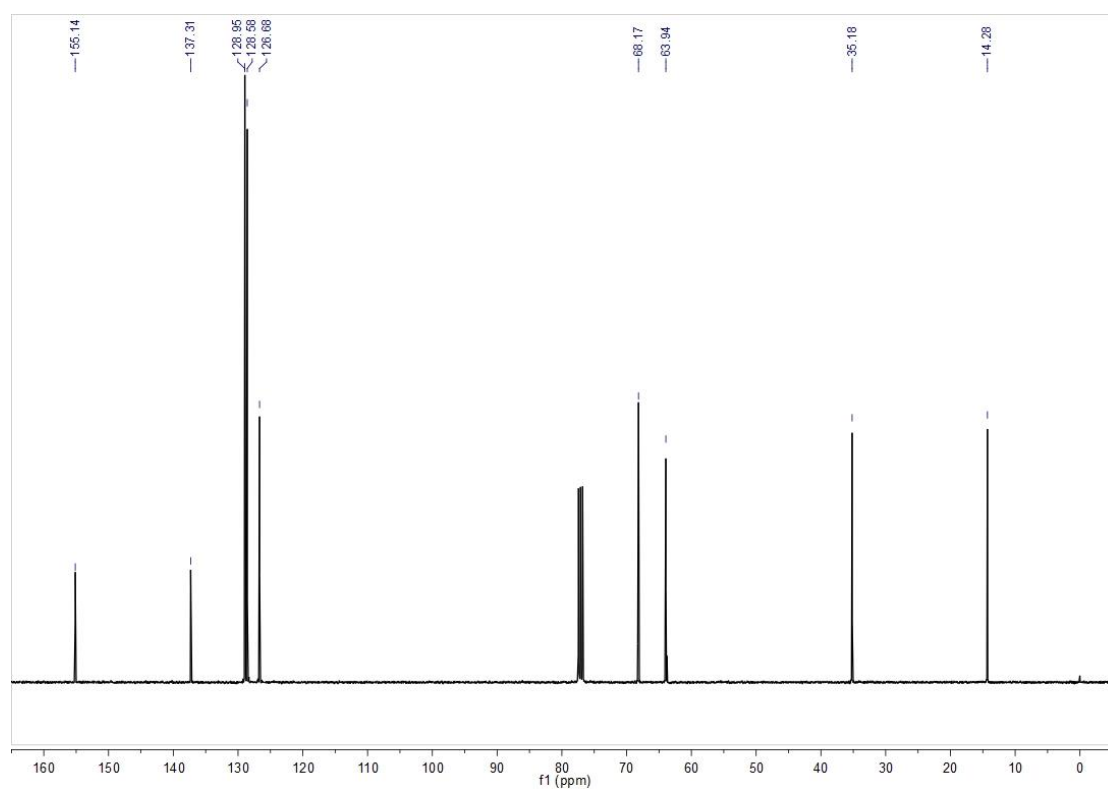

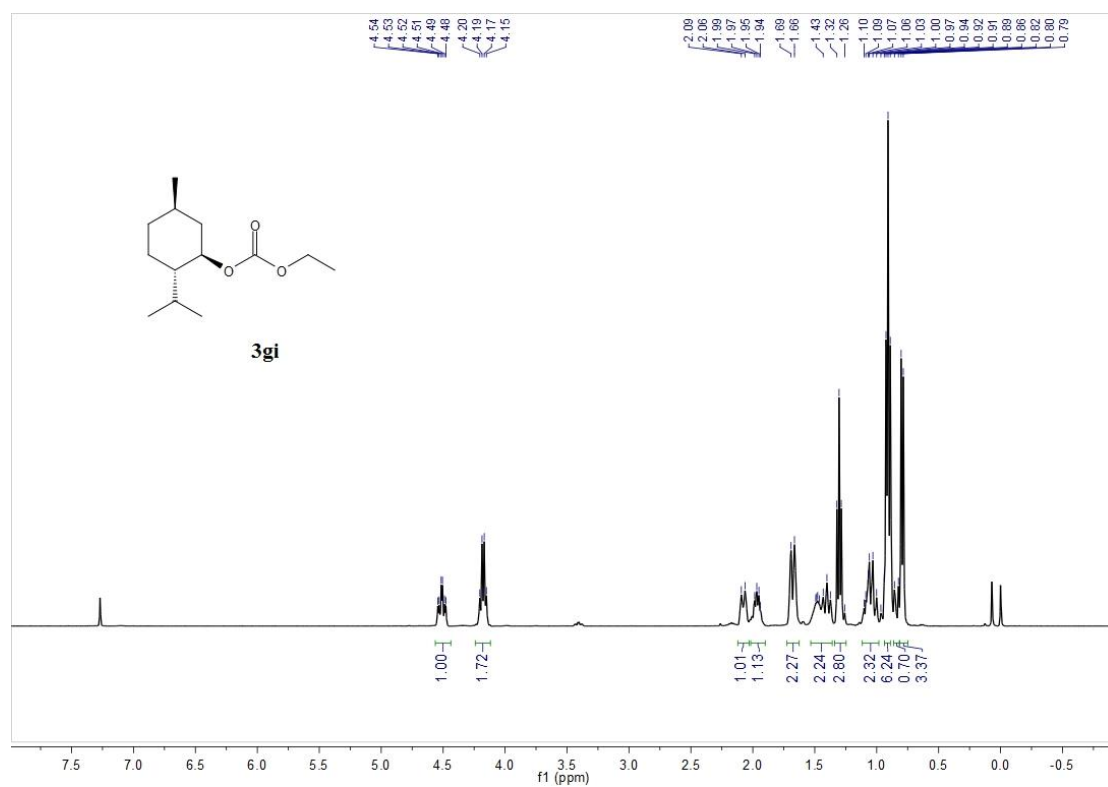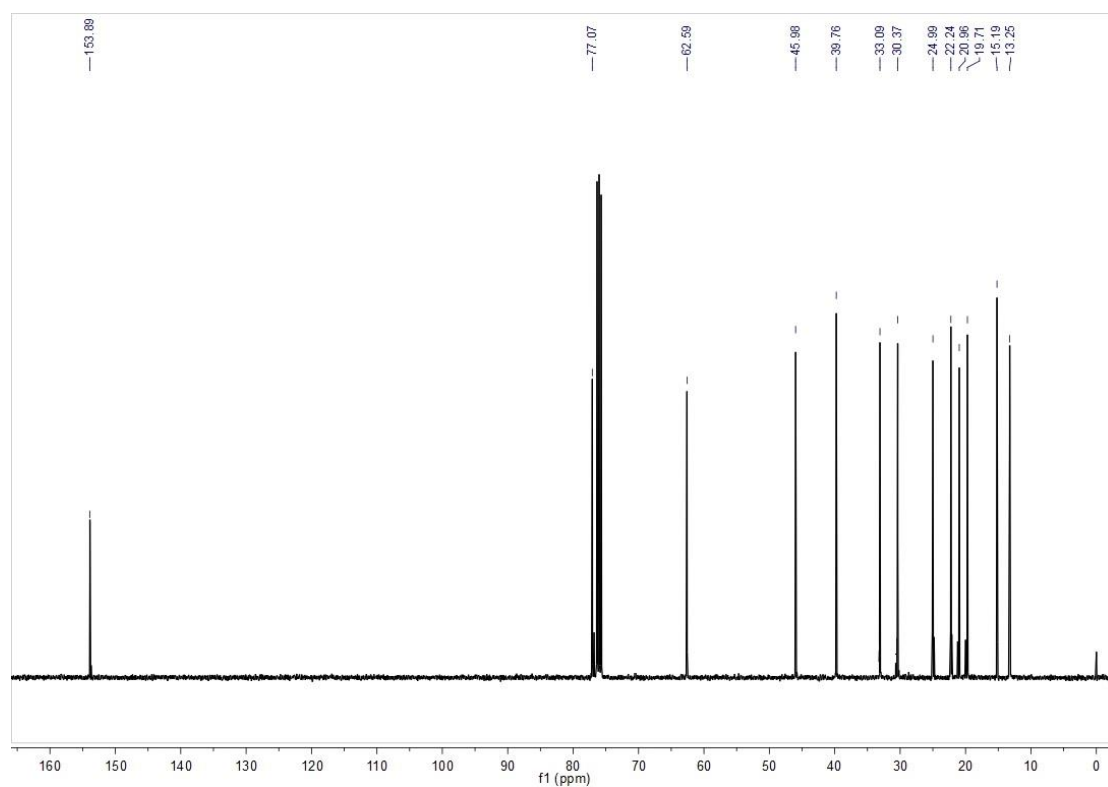

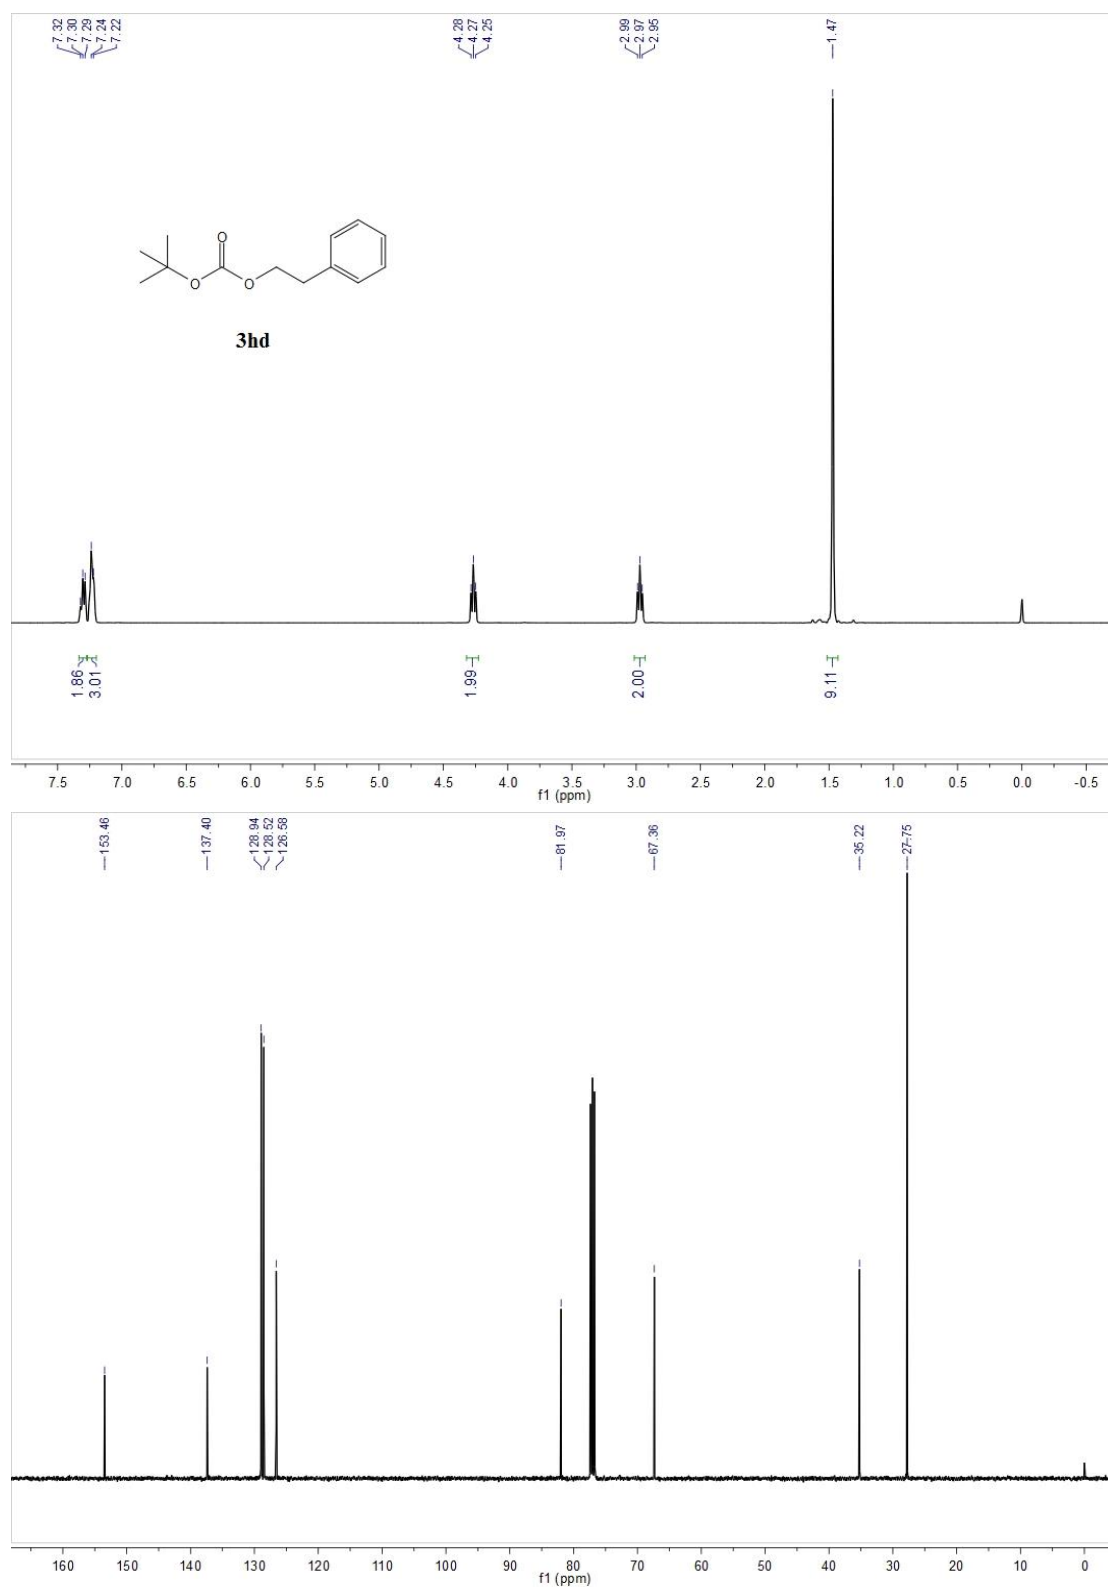

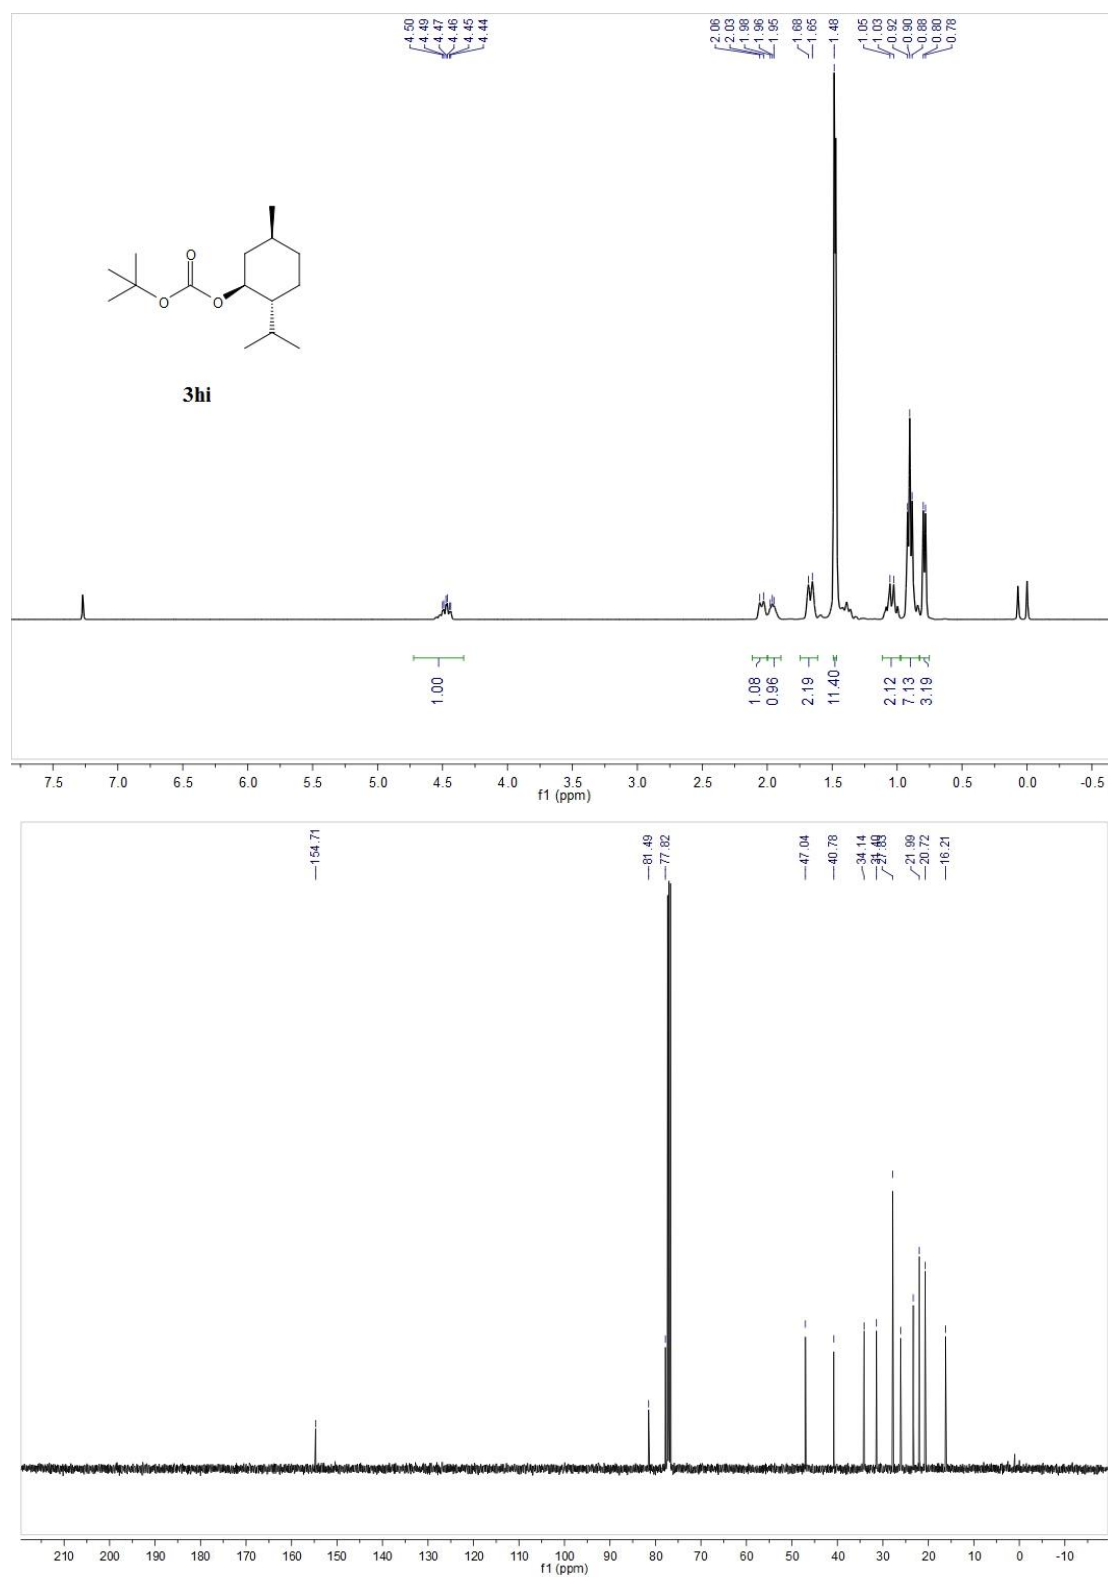



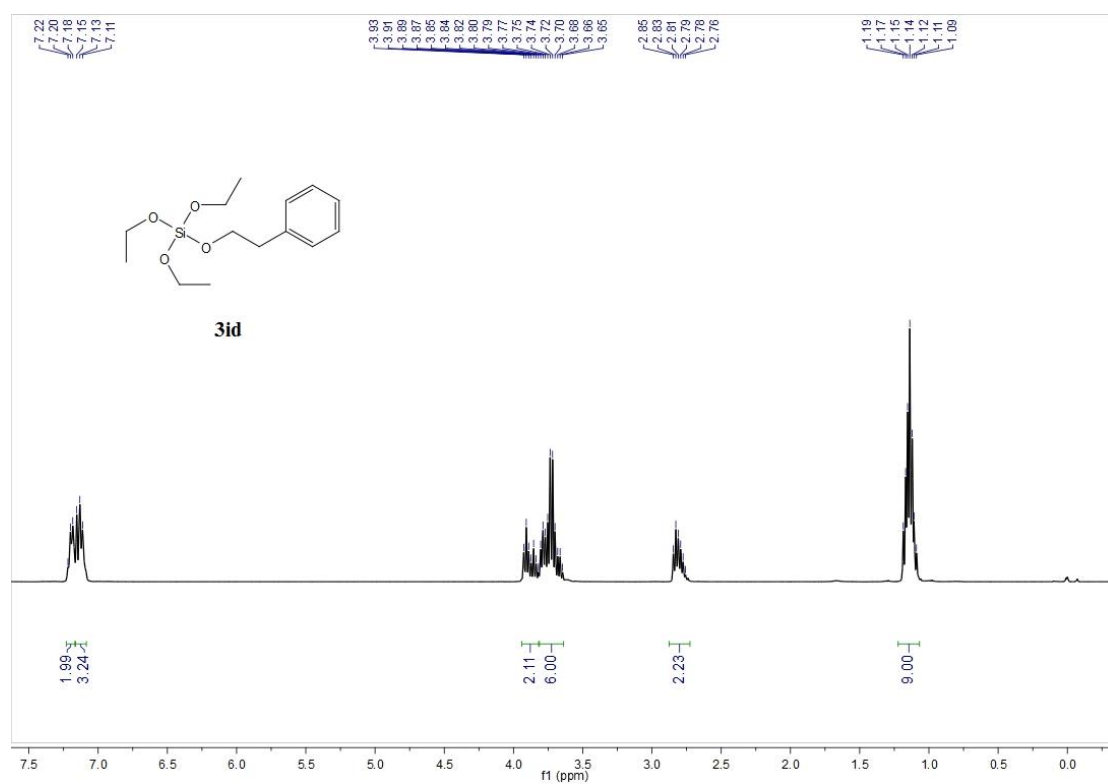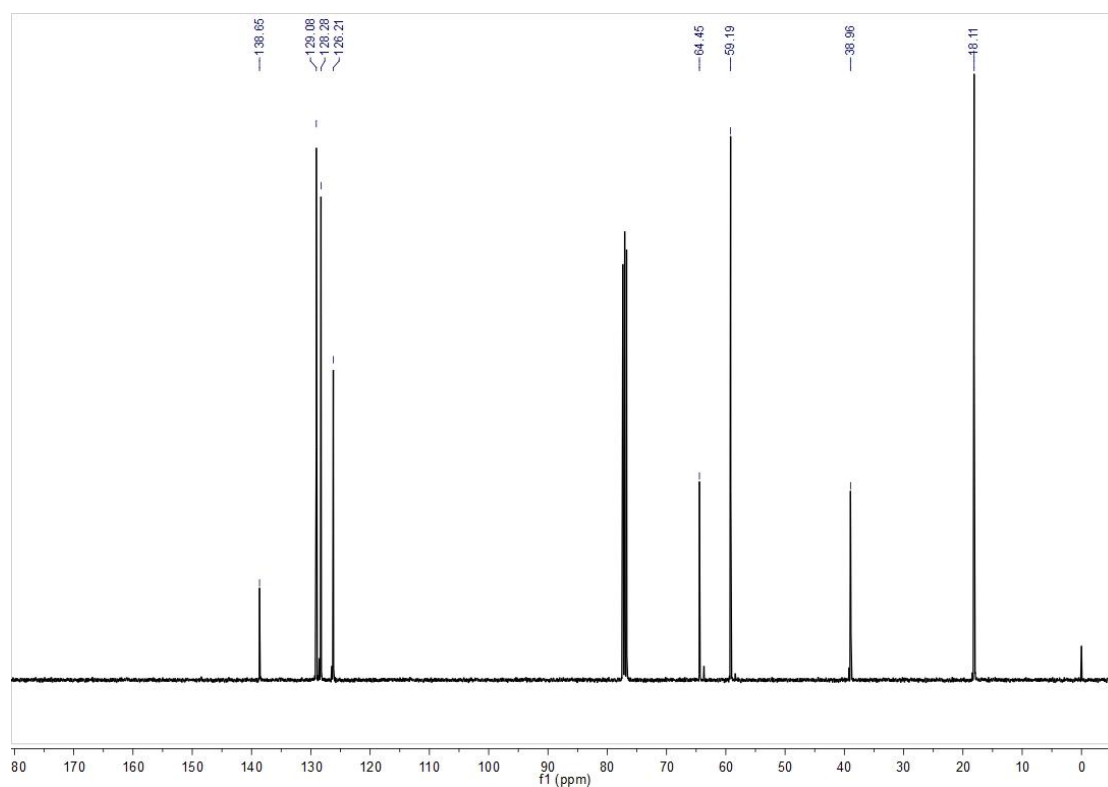

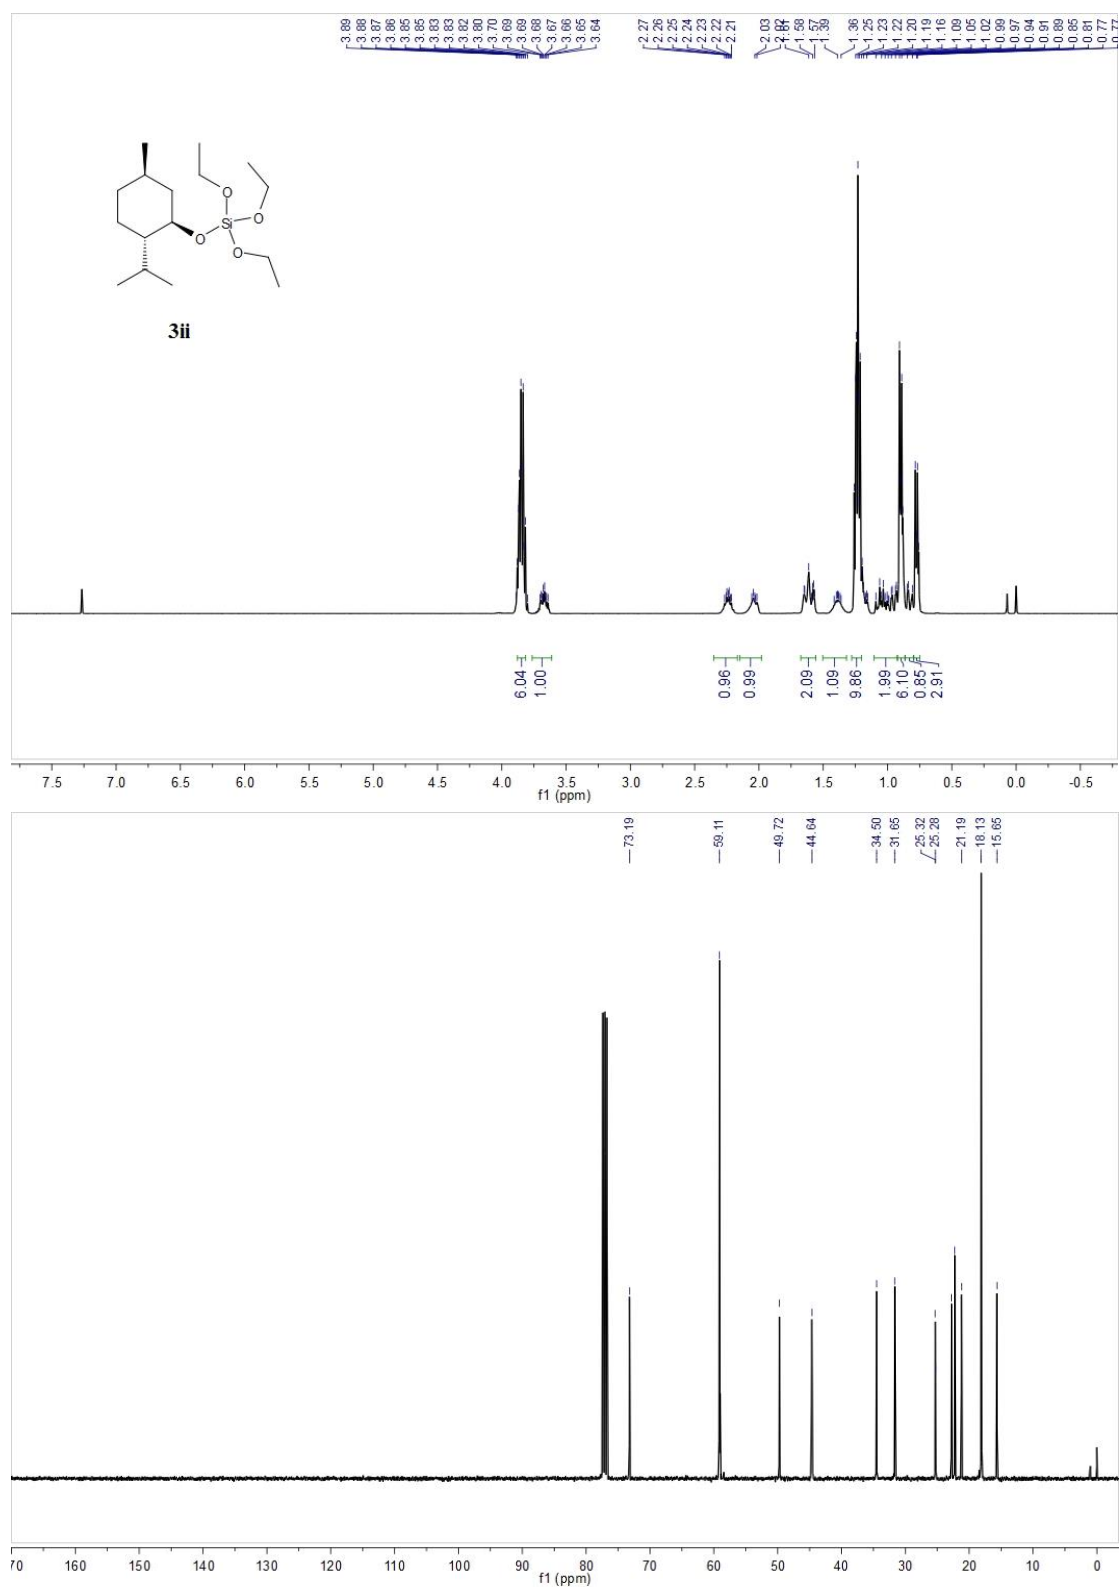

Supplement: Supplementary file 1 [file 3885529]
